# Supplementary material for: Voltage-clamp fluorometry analysis of structural rearrangements of ATP-gated channel P2X2 upon hyperpolarization
Source: eLife journal article supplement (doi:10.7554/elife.65822), 2021-05-19

## Input Data

|                              | Data                                          | Range    |
|------------------------------|-----------------------------------------------|----------|
| control 2 days               | [Book1]Sheet2!A"control 2 days"               | [1*:12*] |
| control 3 days               | [Book1]Sheet2!B"control 3 days"               | [1*:8*]  |
| cytoplasmic injection 2 days | [Book1]Sheet2!C"cytoplasmic injection 2 days" | [1*:8*]  |
| cytoplasmic injection 3 days | [Book1]Sheet2!D"cytoplasmic injection 3 days" | [1*:5*]  |
| nuclear injection 3 days     | [Book1]Sheet2!E"nuclear injection 3 days"     | [1*:6*]  |

## Descriptive Statistics

|                              | N Analysis | N Missing | Mean     | Standard Deviation | SE of Mean |
|------------------------------|------------|-----------|----------|--------------------|------------|
| control 2 days               | 12         | 0         | 4.70833  | 1.86134            | 0.53732    |
| control 3 days               | 8          | 0         | 3.1975   | 2.36339            | 0.83559    |
| cytoplasmic injection 2 days | 8          | 0         | 4.4725   | 2.054              | 0.7262     |
| cytoplasmic injection 3 days | 5          | 0         | 6.426    | 2.98513            | 1.33499    |
| nuclear injection 3 days     | 6          | 0         | 10.60167 | 6.04239            | 2.4668     |

## One Way ANOVA

## Overall ANOVA

|       | DF | Sum of Squares | Mean Square | F Value | Prob>F  |
|-------|----|----------------|-------------|---------|---------|
| Model | 4  | 218.80756      | 54.70189    | 5.72373 | 0.00124 |
| Error | 34 | 324.93907      | 9.55703     |         |         |
| Total | 38 | 543.74663      |             |         |         |

Null Hypothesis: The means of all levels are equal.

Alternative Hypothesis: The means of one or more levels are different.

At the 0.05 level, the population means are significantly different.

## Fit Statistics

|  | R-Square | Coeff Var | Root MSE | Data Mean |
|--|----------|-----------|----------|-----------|
|  | 0.40241  | 0.56445   | 3.09144  | 5.47692   |

## Means Comparisons

## Tukey Test

|                                                           | MeanDiff | SEM     | q Value | Prob       | Alpha | Sig | LCL      | UCL      |
|-----------------------------------------------------------|----------|---------|---------|------------|-------|-----|----------|----------|
| control 3 days control 2 days                             | -1.51083 | 1.41105 | 1.51423 | 0.82006    | 0.05  | 0   | -5.574   | 2.55234  |
| cytoplasmic injection 2 days control 2 days               | -0.23583 | 1.41105 | 0.23636 | 0.99982    | 0.05  | 0   | -4.299   | 3.82734  |
| cytoplasmic injection 2 days control 3 days               | 1.275    | 1.54572 | 1.16652 | 0.92108    | 0.05  | 0   | -3.17598 | 5.72598  |
| cytoplasmic injection 3 days control 2 days               | 1.71767  | 1.64555 | 1.47619 | 0.83316    | 0.05  | 0   | -3.02076 | 6.4561   |
| cytoplasmic injection 3 days control 3 days               | 3.2285   | 1.76239 | 2.59067 | 0.37268    | 0.05  | 0   | -1.8464  | 8.3034   |
| cytoplasmic injection 3 days cytoplasmic injection 2 days | 1.9535   | 1.76239 | 1.56756 | 0.80095    | 0.05  | 0   | -3.1214  | 7.0284   |
| nuclear injection 3 days control 2 days                   | 5.89333  | 1.54572 | 5.39193 | 0.0047     | 0.05  | 1   | 1.44235  | 10.34431 |
| nuclear injection 3 days control 3 days                   | 7.40417  | 1.66957 | 6.27171 | 8.22124E-4 | 0.05  | 1   | 2.59656  | 12.21178 |
| nuclear injection 3 days cytoplasmic injection 2 days     | 6.12917  | 1.66957 | 5.19172 | 0.00688    | 0.05  | 1   | 1.32156  | 10.93678 |
| nuclear injection 3 days cytoplasmic injection 3 days     | 4.17567  | 1.87196 | 3.15459 | 0.1931     | 0.05  | 0   | -1.21474 | 9.56607  |

Sig equals 1 indicates that the difference of the means is significant at the 0.05 level.

Sig equals 0 indicates that the difference of the means is not significant at the 0.05 level.

## Powers

|                   | Alpha | Sample Size | Power   |
|-------------------|-------|-------------|---------|
| Actual Power      | 0.05  | 39          | 0.96309 |
| Hypothesis Powers | 0.05  | 50          | 0.99252 |
|                   | 0.05  | 100         | 1       |
|                   | 0.05  | 200         | 1       |

## Box Charts

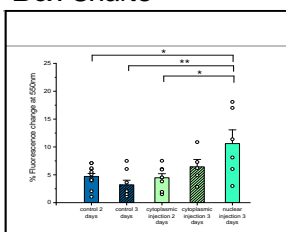

Supplement: supp [file elife-65822-supp-v1.zip]
