# Supplementary material for: Voltage-clamp fluorometry analysis of structural rearrangements of ATP-gated channel P2X2 upon hyperpolarization
Source: eLife journal article supplement (doi:10.7554/elife.65822), 2021-05-19

# Paired Sample t Test (13/04/2019 18:22:26)

## Input Data

|                | Data                  | Range   |
|----------------|-----------------------|---------|
| 1st Data Range | [Book1]WT!A"0 ATP"    | [1*:5*] |
| 2nd Data Range | [Book1]WT!B"30µM ATP" | [1*:5*] |

## Descriptive Statistics

|            |            | N  | Mean    | SD      | SEM     | Median |
|------------|------------|----|---------|---------|---------|--------|
| "0 ATP"    |            | 5  | -0.552  | 0.19917 | 0.08907 | -0.52  |
| "30µM ATP" |            | 5  | -10.484 | 1.19843 | 0.53595 | -10.4  |
|            | Difference | 5  | 9.932   | 1.31669 | 0.58884 | 9.9    |
|            | Overall    | 10 | -5.518  | 5.29691 | 1.67503 | -4.995 |

## Test Statistics

|  | t Statistic | DF | Prob> t   |
|--|-------------|----|-----------|
|  | 16.86703    | 4  | 7.2425E-5 |

Null Hypothesis: mean1-mean2 = 0

Alternative Hypothesis: mean1-mean2 <> 0

At the 0.05 level, the difference of the population means is significantly different from the test difference(0).

## Confidence Intervals for Mean

|  | Conf. Levels in % | Low er Limits | Upper Limits |
|--|-------------------|---------------|--------------|
|  | 90                | 8.67668       | 11.18732     |
|  | 95                | 8.29711       | 11.56689     |
|  | 99                | 7.22092       | 12.64308     |

## Powers

|               | Alpha | Sample Size | Pow er |
|---------------|-------|-------------|--------|
| Actual Pow er | 0.05  | 5           | 1      |
| Hypo. Pow er  | 0.05  | 50          | 1      |
|               | 0.05  | 100         | 1      |
|               | 0.05  | 200         | 1      |

## Plots

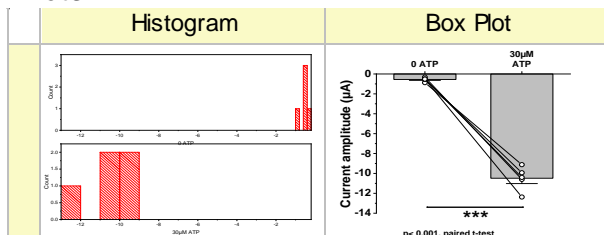

# Paired Sample t Test (13/04/2019 18:33:41)

## Input Data

|                | Data                    | Range   |
|----------------|-------------------------|---------|
| 1st Data Range | [Book1]F44E!A"0 ATP"    | [1*:4*] |
| 2nd Data Range | [Book1]F44E!B"30µM ATP" | [1*:4*] |

## Descriptive Statistics

|            |            | N | Mean  | SD      | SEM     | Median |
|------------|------------|---|-------|---------|---------|--------|
| "0 ATP"    |            | 4 | -0.63 | 0.38557 | 0.19279 | -0.7   |
| "30µM ATP" |            | 4 | -8.15 | 1.48151 | 0.74075 | -7.935 |
|            | Difference | 4 | 7.52  | 1.1465  | 0.57325 | 7.375  |
|            | Overall    | 8 | -4.39 | 4.14266 | 1.46465 | -3.92  |

## Test Statistics

|  | t Statistic | DF | Prob> t    |
|--|-------------|----|------------|
|  | 13.11816    | 3  | 9.56842E-4 |

Null Hypothesis: mean1-mean2 = 0

Alternative Hypothesis: mean1-mean2 <> 0

At the 0.05 level, the difference of the population means is significantly different from the test difference(0).

## Confidence Intervals for Mean

|  | Conf. Levels in % | Low er Limits | Upper Limits |
|--|-------------------|---------------|--------------|
|  | 90                | 6.17092       | 8.86908      |
|  | 95                | 5.69566       | 9.34434      |
|  | 99                | 4.17169       | 10.86831     |

## Powers

|               | Alpha | Sample Size | Pow er |
|---------------|-------|-------------|--------|
| Actual Pow er | 0.05  | 4           | 1      |
| Hypo. Pow er  | 0.05  | 50          | 1      |
|               | 0.05  | 100         | 1      |
|               | 0.05  | 200         | 1      |

## Plots

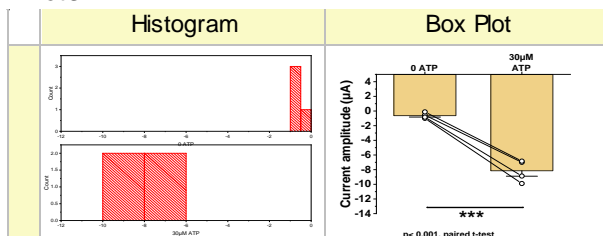

# Paired Sample t Test (13/04/2019 18:18:17)

## Input Data

|                | Data                          | Range   |
|----------------|-------------------------------|---------|
| 1st Data Range | [Book1]F44E/A337R!A"0 ATP"    | [1*:4*] |
| 2nd Data Range | [Book1]F44E/A337R!B"30µM ATP" | [1*:4*] |

## Descriptive Statistics

|            | N | Mean     | SD      | SEM     | Median |
|------------|---|----------|---------|---------|--------|
| "0 ATP"    | 4 | -3.935   | 2.30623 | 1.15312 | -4.04  |
| "30µM ATP" | 4 | -4.0275  | 2.35333 | 1.17666 | -4.17  |
| Difference | 4 | 0.0925   | 0.09251 | 0.04626 | 0.055  |
| Overall    | 8 | -3.98125 | 2.15763 | 0.76284 | -4.055 |

## Test Statistics

| t Statistic | DF | Prob> t |
|-------------|----|---------|
| 1.99976     | 3  | 0.13936 |

Null Hypothesis: mean1-mean2 = 0

Alternative Hypothesis: mean1-mean2 <> 0

At the 0.05 level, the difference of the population means is NOT significantly different from the test difference(0).

## Confidence Intervals for Mean

| Conf. Levels in % | Lower Limits | Upper Limits |
|-------------------|--------------|--------------|
| 90                | -0.01636     | 0.20136      |
| 95                | -0.05471     | 0.23971      |
| 99                | -0.17767     | 0.36267      |

## Powers

|              | Alpha | Sample Size | Power  |
|--------------|-------|-------------|--------|
| Actual Power | 0.05  | 4           | 0.2887 |
| Hypo. Power  | 0.05  | 50          | 1      |
|              | 0.05  | 100         | 1      |
|              | 0.05  | 200         | 1      |

## Plots

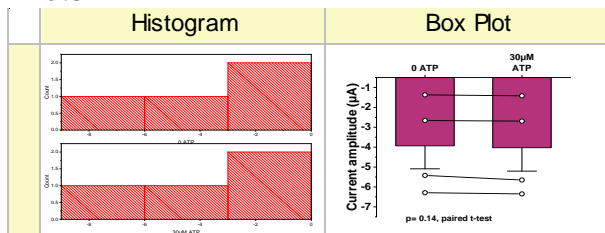

Supplement: supp [file elife-65822-supp-v1.zip]
