# Supplementary material for: Voltage-clamp fluorometry analysis of structural rearrangements of ATP-gated channel P2X2 upon hyperpolarization
Source: eLife. 2021 May 19;10:e65822. doi: 10.7554/eLife.65822 (PMC8184218; doi:10.7554/eLife.65822)
Supplement: Figure 1—figure supplement 1—source data 1. [file elife-65822-fig1-figsupp1-data1.xlsx]

## Sheet: Figure 1—figure supplement 1
Figure 1—figure supplement 1
A337Anap						I341Anap
	(current amplitude in µA at -160 mV)						(current amplitude in µA at -160 mV)
oocyte	current amplitude (ATP 10 µM)	current amplitude (Suramin 300 µM)				oocyte	current amplitude (ATP 10 µM)	current amplitude (Suramin 300 µM)
1	-51.4212	-3.54333				1	-35.9009	-4.57584
2	-16.6485	-1.19348				2	-34.0065	-7.56477
3	-41.0405	-1.77959				3	-39.1499	-3.21392
4	-40.986	-2.83694				4	-33.4889	-1.668
5	-40.8693	-3.18849				5	-60.446	-7.45197
	(current amplitude in µA at -160 mV)						(current amplitude in µA at -160 mV)
oocyte	current amplitude (ATP 10 µM)	current amplitude (PPADS 300 µM)				oocyte	current amplitude (ATP 10 µM)	current amplitude (PPADS 300 µM)
1	-25.5336	-3.57774				1	-31.1626	-5.71367
2	-22.0858	-3.20345				2	-29.3193	-3.9616
3	-39.1968	-5.17811				3	-28.3071	-5.15627
4	-29.0865	-4.21591				4	-34.3652	-6.01884
5	-26.8971	-5.87942				5	-23.1326	-2.43004
holding potential = +20 mV for both constructs
