# Supplementary material for: Voltage-clamp fluorometry analysis of structural rearrangements of ATP-gated channel P2X2 upon hyperpolarization
Source: eLife. 2021 May 19;10:e65822. doi: 10.7554/eLife.65822 (PMC8184218; doi:10.7554/eLife.65822)
Supplement: Figure 1—source data 1. [file elife-65822-fig1-data1.xlsx]

## Sheet: Figure 1
Figure 1
Figure 1E
A337Anap without SIK inhibitor (ATP 10µM)
∆F/F at 440 nm	average	SD	s.e.m		Incidence of F change per batch				Incidence of F change in total batch	(%)
-0.92296	-0.514577	0.395813	0.228523			Total oocytes	(%)		3 batch out of 13 batch	23.0769
-0.488108					batch 1	1/5	20
-0.132662					batch 2	1/16	6.25
					batch 3	1/6	16.6667
						average	14.3056
						SD	7.17264
						s.e.m	4.14113
Figure 1F
I341Anap without SIK inhibitor (ATP 10µM)
∆F/F at 440 nm	average	SD	s.e.m		Incidence of F change per batch				Incidence of F change in total batch	(%)
-0.539834	-0.320476	0.194094	0.11206			Total oocytes	(%)		2 batch out of 10 batch	20
-0.250602					batch 1	2/13	15.3846
-0.170994					batch 1
					batch 2	1/6	16.6667
						average	16.0256
						SD	0.906547
						s.e.m	0.641026
