# Supplementary material for: Voltage-clamp fluorometry analysis of structural rearrangements of ATP-gated channel P2X2 upon hyperpolarization
Source: eLife. 2021 May 19;10:e65822. doi: 10.7554/eLife.65822 (PMC8184218; doi:10.7554/eLife.65822)
Supplement: Figure 2—figure supplement 1—source data 1. [file elife-65822-fig2-figsupp1-data1.xlsx]

## Sheet: Figure 2—figure supplement 1
Figure 2—figure supplement 1
SIK inhibitor treatment P2X2 A337Anap/R313W (300 nM SIK inhibitor)
Without SIK	F trace at 440nm +160mV control	control (% F change baseline subtracted)		%
	0.0123	1.22693		F change
	0.0118	1.17764		57
	0.0152	1.51681
	0.0152	1.51878
	no change	0		no change
	no change	0		43
	no change	0
300 nM SIK	F trace at 440nm +160mV 300nM SIK	300nM SIK (% F change baseline subtracted)		%
	0.0119	1.1855		F change
	0.005	0.498803		80
	0.0151	1.51015
	0.0039	0.389766
	0.019	1.89394
	0.0253	2.52823
	0.004	0.39984
	0.0051	0.509796
	0.003	0.30009
	0.0078	0.778987
	no change	0		no change
	no change	0		20
