# Supplementary material for: Voltage-clamp fluorometry analysis of structural rearrangements of ATP-gated channel P2X2 upon hyperpolarization
Source: eLife. 2021 May 19;10:e65822. doi: 10.7554/eLife.65822 (PMC8184218; doi:10.7554/eLife.65822)
Supplement: Figure 2—source data 1. [file elife-65822-fig2-data1.xlsx]

## Sheet: CIVSP SIK inhibitor; 2D 
Figure 2D
SIK inhibitor treatment CiVSP F401Anap
Control	F trace at 550nm +160mV control	control (% F change baseline subtracted)
	1.022	2.2
	1.0154	1.54
	1.075	7.5
	1.011	1.1
	1.0152	1.52
	1.0605	6.05
	1.0362	3.62
	1.0205	2.05
SIK 30 nM	F trace at 550nm +160mV 30nM SIK	SIK 30nM (% F change; baseline subtracted)
	1.0339	3.39
	1.051	5.1
	1.0353	3.53
	1.1488	14.88
	1.0853	8.53
	1.0296	2.96
SIK 300 nM	F trace at 550nm +160mV 300nM SIK	SIK 300nM (% F change; baseline subtracted)
	1.1138	11.38
	1.1808	18.08
	1.0811	8.11
	1.0299	2.99
	1.0604	6.04
	1.1701	17.01

## Sheet: CiVSP incubation time; 2E
Figure 2D
SIK inhibitor treatment CiVSP F401Anap (300 nM SIK inhibitor)
Control 2 days	F trace at 550nm +160mV control 2 days	control 2 days (% F change baseline subtracted)
	1.0603	6.03
	1.0711	7.11
	1.0507	5.07
	1.0206	2.06
	1.0398	3.98
	1.071	7.1
	1.0106	1.06
	1.0551	5.51
	1.0431	4.31
	1.0403	4.03
	1.0405	4.05
	1.0619	6.19
Control 3 days	F trace at 550nm +160mV control 3 days	control 3 days (% F change baseline subtracted)
	1.022	2.2
	1.0154	1.54
	1.075	7.5
	1.011	1.1
	1.0152	1.52
	1.0605	6.05
	1.0362	3.62
	1.0205	2.05
Cytoplasmic 2 days	F trace at 550nm +160mV cytoplasmic injection 2 days	cytoplasmic injection 2 days (%F change baseline subtracted)
	1.0151	1.51
	1.0605	6.05
	1.0752	7.52
	1.0381	3.81
	1.0449	4.49
	1.0194	1.94
	1.0593	5.93
	1.0453	4.53
Cytoplasmic 3 days	F trace at 550nm +160mV cytoplasmic injection 3 days	cytoplasmic injection 3 days (%F change baseline subtracted)
	1.0284	2.84
	1.1087	10.87
	1.0493	4.93
	1.062	6.2
	1.0729	7.29
Nuclear 3 days	F trace at 550nm +160mV nuclear injection 3 days	nuclear injection 3 days (% F change; baseline subtracted)
	1.1138	11.38
	1.1808	18.08
	1.0811	8.11
	1.0299	2.99
	1.0604	6.04
	1.1701	17.01

## Sheet: P2X2 SIK inhibitor; 2H
Figure 2H
SIK inhibitor treatment P2X2 A337Anap/R313W (300 nM SIK inhibitor)
Without SIK	F trace at 440nm +160mV control	control (% F change baseline subtracted)
	0.0123	1.22693
	0.0118	1.17764
	0.0152	1.51681
	0.0152	1.51878
	no change	0
	no change	0
	no change	0
300 nM SIK	F trace at 440nm +160mV 300nM SIK	300nM SIK (% F change baseline subtracted)
	0.0119	1.1855
	0.005	0.498803
	0.0151	1.51015
	0.0039	0.389766
	0.019	1.89394
	0.0253	2.52823
	0.004	0.39984
	0.0051	0.509796
	0.003	0.30009
	0.0078	0.778987
	no change	0
	no change	0
