# Supplementary material for: Voltage-clamp fluorometry analysis of structural rearrangements of ATP-gated channel P2X2 upon hyperpolarization
Source: eLife. 2021 May 19;10:e65822. doi: 10.7554/eLife.65822 (PMC8184218; doi:10.7554/eLife.65822)
Supplement: Figure 3—figure supplement 1—source data 1. [file elife-65822-fig3-figsupp1-data1.xlsx]

## Sheet: F-V L334Anap
Figure 3—figure supplement 1A, B
L334Anap with SIK inhibitor					10µM ATP	∆F/F is calculated at the steady-state			holding potential = +20 mV
1
% ∆F/F	∆voltage				average ∆voltage	average % ∆F/F	SD	s.e.m
0.084464	19.3176				17.0135	0.0258586	0.0828805	0.0586054
0.0782843	0				0	0.0345734	0.0618164	0.0437108
0.000749368	-19.1956				-16.6931	-0.0315674	0.0457029	0.0323168
-0.00873653	-38.269				-33.0353	-0.0852518	0.108209	0.0765152
-0.0428941	-56.9153				-49.0112	-0.142528	0.140903	0.0996338
-0.0456749	-75.1038				-64.5599	-0.142199	0.136505	0.0965238
-0.0371761	-92.9565				-79.6967	-0.198746	0.228494	0.16157
-0.116541	-110.046				-94.3604	-0.235985	0.168919	0.119444
-0.159975	-126.892				-108.887	-0.302882	0.202101	0.142907
-0.184462	-143.341				-123.291	-0.334798	0.212607	0.150336
-0.180825	-159.363				-137.589	-0.377963	0.278796	0.197138
2					Incidence of F change per batch
% ∆F/F	∆voltage					Total oocytes	(%)
-0.0327468	14.7095				batch 1	2/6	33.3333
-0.00913739	0				batch 2	0/10	-
-0.0638843	-14.1907				batch 3	0/5	-
-0.161767	-27.8015
-0.242162	-41.1072
-0.238723	-54.0161
-0.360316	-66.4368
-0.355428	-78.6743
-0.445789	-90.8813
-0.485134	-103.241
-0.575101	-115.814

## Sheet: F-V L338Anap
Figure 3—figure supplement 1C, D
L338Anap with SIK inhibitor					10µM ATP	∆F/F is calculated at the steady-state			holding potential = +20 mV
1
% ∆F/F	∆voltage				average ∆voltage	average % ∆F/F	SD	s.e.m
0.10459	18.6462				17.7841	0.116484	0.0998669	0.0499334
0.0279696	0				0	0.0458972	0.0597996	0.0298998
-0.0214169	-18.158				-17.334	-0.0222124	0.0285296	0.0142648
-0.0729803	-35.7666				-34.0881	-0.0655812	0.0195927	0.00979635
-0.105683	-52.6428				-49.9725	-0.106203	0.024627	0.0123135
-0.117604	-68.6035				-64.9185	-0.121185	0.0467062	0.0233531
-0.157798	-83.6487				-78.9795	-0.160972	0.0677952	0.0338976
-0.200628	-97.7173				-92.4225	-0.187444	0.0714234	0.0357117
-0.222014	-111.084				-105.27	-0.207094	0.0857388	0.0428694
-0.252074	-123.81				-117.798	-0.235013	0.0828776	0.0414388
-0.286742	-136.078				-130.18	-0.260499	0.0681024	0.0340512
2					Incidence of F change per batch
% ∆F/F	∆voltage					Total oocytes	(%)
0.102128	17.6086				batch 1	2/5	40
0.0388064	0				batch 2	0/5	-
0.00390938	-17.1204				batch 3	2/10	20
-0.0392266	-33.2947					average	30
-0.072149	-48.3704					SD	14.1421
-0.0619769	-62.3474					s.e.m	10
-0.072752	-75.3174
-0.096001	-87.5549
-0.103266	-99.1211
-0.140982	-110.168
-0.179622	-121.033
3
% ∆F/F	∆voltage
0.250497	16.8762
0.12927	0
-0.00924602	-16.0828
-0.0645078	-32.0129
-0.117931	-46.9666
-0.175544	-61.1877
-0.23683	-74.6765
-0.26962	-87.9822
-0.311122	-100.891
-0.338732	-113.739
-0.338765	-126.801
4
% ∆F/F	∆voltage
0.00872016	18.0054
-0.0124574	0
-0.0620961	-17.9749
-0.0856102	-35.2783
-0.12905	-51.9104
-0.129616	-67.5354
-0.176507	-82.2754
-0.183529	-96.4355
-0.191975	-109.985
-0.208265	-123.474
-0.236869	-136.81
