# Supplementary material for: Voltage-clamp fluorometry analysis of structural rearrangements of ATP-gated channel P2X2 upon hyperpolarization
Source: eLife. 2021 May 19;10:e65822. doi: 10.7554/eLife.65822 (PMC8184218; doi:10.7554/eLife.65822)
Supplement: Figure 3—source data 1. [file elife-65822-fig3-data1.xlsx]

## Sheet: F-V A337Anap
Figure 3C
A337Anap with SIK inhibitor				10µM ATP	∆F/F is calculated at the steady-state			holding potential = +20 mV
1
% ∆F/F	∆voltage			average ∆voltage	average % ∆F/F	SD	s.e.m
0.260674	19.4702			18.4822	0.302339	0.112572	0.0398002
0.0334627	0			0	0.0341886	0.0337108	0.0119186
-0.0912052	-19.5923			-18.6005	-0.213222	0.116662	0.0412464
-0.257592	-39.1541			-37.0789	-0.43432	0.211639	0.0748256
-0.418492	-58.6548			-55.2826	-0.644665	0.30043	0.106218
-0.567699	-77.9419			-73.1468	-0.84453	0.380153	0.134405
-0.698939	-97.0459			-90.5838	-1.03681	0.461781	0.163264
-0.837187	-115.784			-107.54	-1.19952	0.515989	0.18243
-0.938399	-134.491			-124.168	-1.33724	0.557074	0.196955
-1.05857	-152.679			-140.293	-1.47423	0.624415	0.220764
2
% ∆F/F	∆voltage
0.308308	19.043
0.070367	0
-0.184283	-19.3176
-0.392164	-38.3911
-0.601876	-57.373
-0.815575	-76.2024
-1.03765	-94.8181
-1.1788	-113.19
-1.35553	-131.287
-1.56555	-148.834
3
% ∆F/F	∆voltage
0.177925	17.8528
-0.0228222	0
-0.190659	-17.8223
-0.384103	-35.675
-0.496691	-53.3752
-0.622999	-70.9534
-0.770548	-88.4399
-0.933269	-105.743
-1.0074	-123.108
-1.0849	-140.045
4
% ∆F/F	∆voltage
0.421464	17.7002
0.0204955	0
-0.289747	-17.5476
-0.679261	-34.8511
-0.951136	-51.6968
-1.24107	-68.1458
-1.5353	-84.0454
-1.71593	-99.1516
-1.84316	-113.77
-1.97527	-127.869
5
% ∆F/F	∆voltage
0.461291	19.5312
0.023958	0
-0.457616	-19.6228
-0.812568	-39.093
-1.21063	-58.6243
-1.54831	-77.9724
-1.864	-97.2595
-2.12156	-116.333
-2.37346	-135.437
-2.66786	-154.327
6
% ∆F/F	∆voltage
0.27771	17.1509
0.072296	0
-0.0997572	-17.6392
-0.239257	-35.0342
-0.339848	-51.5747
-0.478104	-67.1997
-0.565656	-81.5125
-0.670499	-94.8792
-0.765987	-107.239
-0.854396	-118.744
7
% ∆F/F	∆voltage
0.139401	19.0125
0.00938226	0
-0.195307	-19.1345
-0.24471	-38.2385
-0.430716	-57.0374
-0.545142	-75.531
-0.66488	-93.6279
-0.729908	-111.298
-0.879751	-128.51
-0.925311	-145.172
8
% ∆F/F	∆voltage
0.371943	18.0969
0.0663695	0
-0.197204	-18.1274
-0.464907	-36.1938
-0.707935	-53.9246
-0.937339	-71.228
-1.15753	-87.9211
-1.409	-103.943
-1.5342	-119.507
-1.66201	-134.674

## Sheet: Incidence of F change A337Anap
A337Anap with SIK inhibitor (ATP 10µM)
Incidence of F change per batch
	Total oocytes	(%)
batch 1	6/8	75
batch 2	5/8	62.5
batch 3	4/6	66.6667
batch 4	7/9	77.7778
batch 5	5/8	62.5
	average incidence	68.8889
	SD	7.12271
	s.e.m	3.18537
NOTE:
all including %F change < 0.8%
for analysis only %F change > 0.8% was analyzed
therefore for analysis: n=8 only

## Sheet: F-V I341Anap
Figure 3G
I341Anap with SIK inhibitor					10µM ATP	∆F/F is calculated at the steady-state			holding potential = -40 mV
1
% ∆F/F	∆voltage				average ∆voltage	average % ∆F/F	SD	s.e.m
0.819733	74.8291				74.9207	0.563312	0.262879	0.151773
0.6781	56.2744				56.1625	0.448219	0.234275	0.135258
0.426158	37.4146				37.2823	0.277762	0.146153	0.0843816
0.183389	18.7073				18.5547	0.15915	0.0233375	0.0134739
-0.0474489	0				0	-0.00482653	0.0473364	0.0273297
-0.24695	-18.5852				-18.3716	-0.125734	0.106095	0.0612538
-0.411593	-37.0483				-36.4685	-0.270748	0.137853	0.0795896
-0.621157	-55.4504				-54.3823	-0.342472	0.24174	0.139569
-0.793389	-73.5779				-72.0011	-0.456797	0.291581	0.168344
-0.98901	-91.2781				-89.2639	-0.523089	0.40507	0.233867
-1.08401	-108.276				-105.977	-0.627566	0.395306	0.22823
2
% ∆F/F	∆voltage
0.29442	72.8149
0.209785	54.5654
0.13396	36.1328
0.136832	17.9138
-0.0131504	0
-0.049757	-17.6697
-0.264556	-35.0342
-0.189376	-52.1851
-0.281505	-69.0918
-0.2545	-85.5103
-0.395967	-101.135
3
% ∆F/F	∆voltage
0.575783	77.1179
0.456774	57.6477
0.273168	38.2996
0.15723	19.043
0.0461197	0
-0.0804966	-18.8599
-0.136095	-37.323
-0.216883	-55.5115
-0.295496	-73.3337
-0.325758	-91.0034
-0.402723	-108.521

## Sheet: Incidence of F change I341Anap
I341Anap with SIK inhibitor (ATP 10µM)
Incidence of F change per batch
	Total oocytes	(%)
batch 1	3/6	50
batch 2	4/9	44.4444
batch 3	1/5	20
	average incidence	38.1481
	SD	15.9603
	s.e.m	9.21471
NOTE:
all including %F change ≤0.4%
for analysis only %F change ≥0.4% was analyzed
therefore for analysis: n=3 only

## Sheet: G-V
Figure 3D, 3H
G-V
A337Anap	10µM ATP	n=8		I341Anap	10µM ATP	n=3		WT large expression level	10µM ATP	n=3
Voltage	Average G/Gmax	s.e.m		Voltage	Average G/Gmax	s.e.m		Voltage	Average G/Gmax	s.e.m
-140	0.9114	0.0161549		-140	0.870361	0.019562		-140	0.802695	0.0417913
-120	0.884232	0.0204784		-120	0.839652	0.0279061		-120	0.728463	0.0616116
-100	0.852198	0.0261988		-100	0.812272	0.0400553		-100	0.646417	0.0808516
-80	0.8174	0.0326674		-80	0.787353	0.0535498		-80	0.564931	0.094246
-60	0.78242	0.0387673		-60	0.765303	0.0662342		-60	0.490816	0.0984975
-40	0.749765	0.0435199		-40	0.746531	0.0769909		-40	0.427235	0.0935295
-20	0.721133	0.0467103		-20	0.731435	0.0853799		-20	0.374383	0.0817735
0	0.697162	0.048724		0	0.719931	0.0913982		0	0.331116	0.0669725
20	0.67848	0.0501312		20	0.711384	0.0956179		20	0.296057	0.0534392
40	0.664383	0.0511593		40	0.705289	0.0984363		40	0.267974	0.0454571
