# Supplementary material for: Voltage-clamp fluorometry analysis of structural rearrangements of ATP-gated channel P2X2 upon hyperpolarization
Source: eLife. 2021 May 19;10:e65822. doi: 10.7554/eLife.65822 (PMC8184218; doi:10.7554/eLife.65822)
Supplement: Figure 4—figure supplement 1—source data 1. [file elife-65822-fig4-figsupp1-data1.xlsx]

## Sheet: G-V; S.Fig 1B,D
Figure 4–figure supplement 1B,D
G-V
R313F	100µM ATP	n=3		R313W	100µM ATP	n=3		WT	100µM ATP	n=3
Voltage	Average G/Gmax	s.e.m		Voltage	Average G/Gmax	s.e.m		Voltage	Average G/Gmax	s.e.m
-140	0.524837	0.0483213		-140	0.750966	0.0192482		-140	0.961497	0.0187886
-120	0.421553	0.0385152		-120	0.618149	0.0184068		-120	0.944171	0.0249544
-100	0.324308	0.0284319		-100	0.48126	0.0166731		-100	0.920033	0.0323754
-80	0.247172	0.0208026		-80	0.373702	0.0152818		-80	0.885847	0.0406958
-60	0.189705	0.0163983		-60	0.305113	0.0169649		-60	0.841907	0.0491826
-40	0.150753	0.0140437		-40	0.266153	0.020626		-40	0.78934	0.0567647
-20	0.126008	0.0134442		-20	0.245873	0.0239889		-20	0.732141	0.0622427
0	0.110331	0.0136719		0	0.235669	0.0262189		0	0.674007	0.0646507
20	0.100895	0.0142184		20	0.230585	0.0276234		20	0.620575	0.063671
40	0.0952502	0.0147646		40	0.228086	0.0284156		40	0.57685	0.0599883

## Sheet: R313WA337Anap 0 30µM; S.Fig 1G
Figure 4–figure supplement 1G
A337Anap/R313W
∆F/F at 440nm
0 ATP	30uM ATP
-3.05814	-2.54061
-5.61605	-3.06089
-1.99926	-1.58223
-1.52013	-0.870847
-1.73538	-1.02193
File 1	0 ATP								30µM ATP
voltage	baseline	F trace	∆F	average baseline	∆F/F	% ∆F/F			baseline	F trace	∆F	average baseline	∆F/F	% ∆F/F
40	1	1.00496	0.00495815	0.999988	0.00495821	0.495821			1	1.00346	0.00345957	0.99999	0.00345961	0.345961
20	0.999979	0.997317	-0.00266242		-0.00266245	-0.266245			0.999999	0.999436	-0.00056392		-0.000563925	-0.0563925
0	1.00001	0.996478	-0.00352782		-0.00352786	-0.352786			0.999994	0.996356	-0.00363791		-0.00363795	-0.363795
-20	0.999977	0.991626	-0.00835091		-0.00835101	-0.835101			0.999983	0.992068	-0.00791562		-0.0079157	-0.79157
-40	0.999988	0.987595	-0.0123934		-0.0123935	-1.23935			1	0.98911	-0.010891		-0.0108911	-1.08911
-60	0.999972	0.982305	-0.0176671		-0.0176673	-1.76673			0.99996	0.984878	-0.0150818		-0.015082	-1.5082
-80	0.99997	0.979475	-0.020495		-0.0204952	-2.04952			1.00001	0.982558	-0.0174485		-0.0174487	-1.74487
-100	0.999999	0.975732	-0.0242669		-0.0242672	-2.42672			0.999971	0.978747	-0.0212239		-0.0212241	-2.12241
-120	1	0.971322	-0.0286827		-0.0286831	-2.86831			0.999964	0.975901	-0.0240636		-0.0240638	-2.40638
-140	0.999985	0.969404	-0.030581		-0.0305814	-3.05814			1.00002	0.974611	-0.0254059		-0.0254061	-2.54061
File 2	0 ATP								30µM ATP
voltage	baseline	F trace	∆F	average baseline	∆F/F	% ∆F/F			baseline	F trace	∆F	average baseline	∆F/F	% ∆F/F
40	1.00001	1.00589	0.00588489	1	0.00588488	0.588488			0.999999	1.00321	0.00321525	0.999999	0.00321526	0.321526
20	0.999993	0.998037	-0.00195593		-0.00195592	-0.195592			0.999998	0.999017	-0.000980616		-0.000980616	-0.0980616
0	1	0.989781	-0.0102239		-0.0102239	-1.02239			1	0.993957	-0.00604486		-0.00604487	-0.604487
-20	1	0.983467	-0.0165353		-0.0165353	-1.65353			0.999996	0.989823	-0.0101731		-0.0101731	-1.01731
-40	1.00001	0.975456	-0.0245542		-0.0245542	-2.45542			1	0.985486	-0.0145147		-0.0145148	-1.45148
-60	1	0.969353	-0.0306485		-0.0306484	-3.06484			1	0.981371	-0.0186285		-0.0186285	-1.86285
-80	1	0.962344	-0.0376582		-0.0376581	-3.76581			0.999999	0.977729	-0.0222703		-0.0222703	-2.22703
-100	1.00001	0.955751	-0.0442551		-0.0442551	-4.42551			1	0.974438	-0.0255616		-0.0255616	-2.55616
-120	0.999993	0.949427	-0.0505654		-0.0505653	-5.05653			1	0.97187	-0.0281301		-0.0281301	-2.81301
-140	0.999995	0.943835	-0.0561606		-0.0561605	-5.61605			0.999998	0.969389	-0.0306088		-0.0306089	-3.06089
File 3	0 ATP								30µM ATP
voltage	baseline	F trace	∆F	average baseline	∆F/F	% ∆F/F			baseline	F trace	∆F	average baseline	∆F/F	% ∆F/F
40	1	1.00069	0.000691772	1	0.000691768	0.0691768			1	1.0009	0.000896335	1	0.000896332	0.0896332
20	1	0.997347	-0.00265378		-0.00265377	-0.265377			1.00001	0.998593	-0.00141782		-0.00141781	-0.141781
0	1.00001	0.994808	-0.0052017		-0.00520167	-0.520167			1.00001	0.996846	-0.00316024		-0.00316023	-0.316023
-20	0.999999	0.991316	-0.0086832		-0.00868316	-0.868316			1	0.994272	-0.00572932		-0.0057293	-0.57293
-40	1.00001	0.989803	-0.0102043		-0.0102042	-1.02042			0.999996	0.992274	-0.00772214		-0.00772212	-0.772212
-60	1	0.987744	-0.0122589		-0.0122589	-1.22589			1.00001	0.99063	-0.00937825		-0.00937823	-0.937823
-80	1	0.9857	-0.0143024		-0.0143024	-1.43024			1	0.988679	-0.011326		-0.0113259	-1.13259
-100	1	0.982743	-0.0172615		-0.0172614	-1.72614			1	0.986921	-0.0130795		-0.0130795	-1.30795
-120	1.00001	0.981749	-0.0182593		-0.0182593	-1.82593			0.999996	0.985445	-0.014551		-0.0145509	-1.45509
-140	1.00001	0.980019	-0.0199927		-0.0199926	-1.99926			1	0.984178	-0.0158223		-0.0158223	-1.58223
File 4	0 ATP								30µM ATP
voltage	baseline	F trace	∆F	average baseline	∆F/F	% ∆F/F			baseline	F trace	∆F	average baseline	∆F/F	% ∆F/F
40	1	1.00036	0.00035727	0.999999	0.00035727	0.035727			1	1.00063	0.000632524	1	0.000632524	0.0632524
20	0.999999	0.998764	-0.00123477		-0.00123477	-0.123477			1	0.999545	-0.000456154		-0.000456154	-0.0456154
0	0.999997	0.997824	-0.00217247		-0.00217247	-0.217247			1	0.998034	-0.00196636		-0.00196636	-0.196636
-20	1	0.995447	-0.00455338		-0.00455338	-0.455338			1	0.996864	-0.00313789		-0.00313788	-0.313788
-40	0.999999	0.993163	-0.00683635		-0.00683636	-0.683636			1	0.99587	-0.0041306		-0.0041306	-0.41306
-60	0.999999	0.990951	-0.00904769		-0.00904769	-0.904769			1	0.994611	-0.00538927		-0.00538927	-0.538927
-80	0.999999	0.988914	-0.0110855		-0.0110855	-1.10855			1	0.993869	-0.0061323		-0.0061323	-0.61323
-100	1	0.988542	-0.0114583		-0.0114583	-1.14583			1	0.993269	-0.00673234		-0.00673234	-0.673234
-120	0.999997	0.987357	-0.0126402		-0.0126402	-1.26402			1	0.991825	-0.00817633		-0.00817632	-0.817632
-140	1	0.9848	-0.0152013		-0.0152013	-1.52013			1	0.991292	-0.00870848		-0.00870847	-0.870847
File 5	0 ATP								30µM ATP
voltage	baseline	F trace	∆F	average baseline	∆F/F	% ∆F/F			baseline	F trace	∆F	average baseline	∆F/F	% ∆F/F
40	1	1.00131	0.00130415	1	0.00130415	0.130415			0.999999	1.00044	0.0004372	1	0.0004372	0.04372
20	1	0.998941	-0.00106114		-0.00106114	-0.106114			1	0.999272	-0.000729024		-0.000729024	-0.0729024
0	0.999999	0.996324	-0.00367522		-0.00367522	-0.367522			1	0.998223	-0.00177884		-0.00177884	-0.177884
-20	1	0.993629	-0.00637037		-0.00637037	-0.637037			0.999999	0.99585	-0.00414854		-0.00414854	-0.414854
-40	0.999998	0.991919	-0.00807959		-0.00807959	-0.807959			1	0.995043	-0.00495815		-0.00495815	-0.495815
-60	1	0.988392	-0.01161		-0.01161	-1.161			1	0.993748	-0.00625157		-0.00625157	-0.625157
-80	1	0.987957	-0.0120431		-0.0120431	-1.20431			0.999999	0.992933	-0.00706547		-0.00706547	-0.706547
-100	0.999995	0.98665	-0.0133452		-0.0133452	-1.33452			1	0.991602	-0.00839919		-0.00839919	-0.839919
-120	1	0.984218	-0.0157828		-0.0157828	-1.57828			0.999999	0.99078	-0.00921875		-0.00921875	-0.921875
-140	1	0.982647	-0.0173538		-0.0173538	-1.73538			1	0.989783	-0.0102193		-0.0102193	-1.02193

## Sheet: R313WA337Anap 0 100µM; S.Fig 1J
Figure 4–figure supplement 1J
A337Anap/R313W
∆F/F at 440nm
0 ATP	100uM ATP
-4.02919	-1.27896
-2.59239	-0.979984
-1.66619	-0.656164
-3.15091	-1.55796
-1.83034	-0.511926
File 1	0 ATP								100µM ATP
voltage	baseline	F trace	∆F	average baseline	∆F/F	% ∆F/F			baseline	F trace	∆F	average baseline	∆F/F	% ∆F/F
40	0.999936	1.00415	0.00421333	1.00007	0.00421305	0.421305			1.0001	1.00211	0.00201082	0.999999	0.00201082	0.201082
20	1.00008	0.997701	-0.00237477		-0.00237461	-0.237461			1.00005	0.998949	-0.00109828		-0.00109828	-0.109828
0	1.00019	0.995668	-0.00452566		-0.00452536	-0.452536			1.00002	0.996606	-0.00341368		-0.00341368	-0.341368
-20	1.00015	0.990609	-0.00953943		-0.00953878	-0.953878			0.99978	0.993663	-0.00611722		-0.00611723	-0.611723
-40	0.999962	0.984262	-0.0157004		-0.0156993	-1.56993			1.00001	0.992074	-0.00793886		-0.00793887	-0.793887
-60	1.00019	0.981332	-0.0188563		-0.0188551	-1.88551			1.00011	0.991343	-0.00876254		-0.00876255	-0.876255
-80	1.00012	0.972875	-0.0272444		-0.0272426	-2.72426			0.999998	0.988896	-0.0111019		-0.0111019	-1.11019
-100	1.00009	0.971241	-0.0288448		-0.0288428	-2.88428			0.999985	0.988025	-0.01196		-0.01196	-1.196
-120	1.00018	0.968084	-0.0320935		-0.0320913	-3.20913			0.999924	0.98782	-0.0121042		-0.0121042	-1.21042
-140	0.999789	0.959494	-0.0402946		-0.0402919	-4.02919			1.00001	0.987224	-0.0127896		-0.0127896	-1.27896
File 2	0 ATP								100µM ATP
voltage	baseline	F trace	∆F	average baseline	∆F/F	% ∆F/F			baseline	F trace	∆F	average baseline	∆F/F	% ∆F/F
40	0.999996	1.0021	0.00210071	0.999997	0.00210071	0.210071			1	0.999434	-0.000566483	0.999999	-0.000566483	-0.0566483
20	1	0.997779	-0.00222343		-0.00222344	-0.222344			1	0.999002	-0.000999093		-0.000999094	-0.0999094
0	1	0.99383	-0.00617176		-0.00617178	-0.617178			0.999999	0.997077	-0.00292158		-0.00292158	-0.292158
-20	0.999993	0.992442	-0.0075503		-0.00755032	-0.755032			1	0.99577	-0.00423074		-0.00423074	-0.423074
-40	1	0.989305	-0.0106993		-0.0106994	-1.06994			0.999999	0.993845	-0.00615394		-0.00615395	-0.615395
-60	0.999997	0.985745	-0.0142523		-0.0142523	-1.42523			0.999998	0.993297	-0.00670111		-0.00670112	-0.670112
-80	0.999993	0.983571	-0.0164226		-0.0164227	-1.64227			1	0.991492	-0.00850838		-0.00850839	-0.850839
-100	1	0.980382	-0.0196198		-0.0196198	-1.96198			0.999998	0.991216	-0.00878209		-0.00878209	-0.878209
-120	1	0.977297	-0.0227066		-0.0227067	-2.27067			1	0.99098	-0.00902313		-0.00902314	-0.902314
-140	0.999983	0.974059	-0.0259238		-0.0259239	-2.59239			0.999992	0.990192	-0.00979984		-0.00979984	-0.979984
File 3	0 ATP								100µM ATP
voltage	baseline	F trace	∆F	average baseline	∆F/F	% ∆F/F			baseline	F trace	∆F	average baseline	∆F/F	% ∆F/F
40	1.00002	1.00168	0.00165451	1.00001	0.00165451	0.165451			1.00002	0.999106	-0.00091058	1.00002	-0.000910581	-0.0910581
20	1.00002	0.997058	-0.00296366		-0.00296367	-0.296367			1.00003	0.998339	-0.00169319		-0.00169319	-0.169319
0	1	0.995303	-0.00469887		-0.00469888	-0.469888			1.00011	0.996982	-0.00313151		-0.00313151	-0.313151
-20	1.00002	0.99368	-0.00633651		-0.00633653	-0.633653			0.999957	0.996749	-0.00320822		-0.00320822	-0.320822
-40	0.999984	0.99152	-0.00846386		-0.00846388	-0.846388			1.00008	0.99483	-0.00525194		-0.00525195	-0.525195
-60	1	0.989911	-0.0100899		-0.01009	-1.009			1.00009	0.995283	-0.00480783		-0.00480783	-0.480783
-80	1	0.988834	-0.0111685		-0.0111685	-1.11685			0.999953	0.994239	-0.00571448		-0.00571448	-0.571448
-100	1.00001	0.987021	-0.0129899		-0.0129899	-1.29899			0.999871	0.993809	-0.00606167		-0.00606168	-0.606168
-120	1	0.984753	-0.0152519		-0.0152519	-1.52519			1	0.993481	-0.00652099		-0.00652099	-0.652099
-140	1.00002	0.983355	-0.016662		-0.016662	-1.6662			1.00006	0.993498	-0.00656176		-0.00656176	-0.656176
File 4	0 ATP								100µM ATP
voltage	baseline	F trace	∆F	average baseline	∆F/F	% ∆F/F			baseline	F trace	∆F	average baseline	∆F/F	% ∆F/F
40	0.999996	1.00336	0.00336283	0.999998	0.00336284	0.336284			0.999995	1.00151	0.00151187	0.999996	0.00151188	0.151188
20	0.99999	0.99845	-0.00153977		-0.00153977	-0.153977			1	0.999394	-0.000606		-0.000606003	-0.0606003
0	0.999992	0.994219	-0.00577372		-0.00577373	-0.577373			1.00001	0.996291	-0.00371373		-0.00371374	-0.371374
-20	1.00001	0.989806	-0.0102075		-0.0102075	-1.02075			0.999998	0.994348	-0.00565004		-0.00565007	-0.565007
-40	0.999983	0.985526	-0.0144562		-0.0144562	-1.44562			0.999995	0.992309	-0.0076862		-0.00768623	-0.768623
-60	0.999996	0.981114	-0.018882		-0.018882	-1.8882			0.999985	0.990255	-0.00972956		-0.0097296	-0.97296
-80	1.00002	0.977757	-0.0222622		-0.0222622	-2.22622			0.999996	0.98853	-0.0114655		-0.0114655	-1.14655
-100	0.999994	0.974476	-0.0255179		-0.0255179	-2.55179			0.999992	0.98673	-0.0132624		-0.0132624	-1.32624
-120	1	0.971567	-0.0284376		-0.0284377	-2.84377			0.999997	0.985858	-0.0141388		-0.0141389	-1.41389
-140	0.999995	0.968486	-0.031509		-0.0315091	-3.15091			0.999997	0.984417	-0.0155795		-0.0155796	-1.55796
File 5	0 ATP								100µM ATP
voltage	baseline	F trace	∆F	average baseline	∆F/F	% ∆F/F			baseline	F trace	∆F	average baseline	∆F/F	% ∆F/F
40	0.999977	1.00138	0.00140733	1.00001	0.00140731	0.140731			0.999997	1.00001	1.14441e-05	1	1.14441e-05	0.00114441
20	1.00002	0.998511	-0.00151283		-0.00151281	-0.151281			1	0.999226	-0.000778258		-0.000778257	-0.0778257
0	1.00001	0.996517	-0.00349295		-0.00349291	-0.349291			0.999999	0.998804	-0.00119561		-0.00119561	-0.119561
-20	1	0.994419	-0.00558436		-0.0055843	-0.55843			1	0.997329	-0.00267506		-0.00267506	-0.267506
-40	1.00003	0.992383	-0.00764465		-0.00764457	-0.764457			1	0.997141	-0.00285959		-0.00285959	-0.285959
-60	0.999995	0.990952	-0.00904298		-0.00904288	-0.904288			1	0.996413	-0.00359136		-0.00359136	-0.359136
-80	1.00002	0.988865	-0.0111509		-0.0111508	-1.11508			0.999995	0.996737	-0.00325865		-0.00325864	-0.325864
-100	1.00001	0.987362	-0.0126474		-0.0126472	-1.26472			1	0.99665	-0.00334924		-0.00334924	-0.334924
-120	1.00004	0.984862	-0.0151731		-0.015173	-1.5173			1	0.99534	-0.00466061		-0.0046606	-0.46606
-140	1.00002	0.981712	-0.0183036		-0.0183034	-1.83034			0.999998	0.994879	-0.00511926		-0.00511926	-0.511926
