# Supplementary material for: Voltage-clamp fluorometry analysis of structural rearrangements of ATP-gated channel P2X2 upon hyperpolarization
Source: eLife. 2021 May 19;10:e65822. doi: 10.7554/eLife.65822 (PMC8184218; doi:10.7554/eLife.65822)
Supplement: Figure 4—source data 1. [file elife-65822-fig4-data1.xlsx]

## Sheet: A337Anap 0 and 30µM; Fig. 4B
Figure 4B
A337Anap
∆F/F at 440nm
0 ATP	10µM ATP
-3.11777	-1.07166
-1.0224	-0.335103
-1.8096	-0.752646
-1.73128	-0.796294
File 1	0 ATP								10µM ATP
voltage	baseline	F trace	∆F	average baseline	∆F/F	% ∆F/F			baseline	F trace	∆F	average baseline	∆F/F	% ∆F/F
40	1	1.00158	0.00157523	1	0.00157523	0.157523			0.999996	1.00127	0.00127494	1	0.00127494	0.127494
20	1	0.996836	-0.00316626		-0.00316626	-0.316626			0.999997	0.999356	-0.000641167		-0.000641167	-0.0641167
0	1	0.992687	-0.00731558		-0.00731557	-0.731557			0.999996	0.998038	-0.00195795		-0.00195795	-0.195795
-20	1.00001	0.989463	-0.010542		-0.010542	-1.0542			1	0.995808	-0.00419277		-0.00419277	-0.419277
-40	0.999999	0.984878	-0.0151219		-0.0151219	-1.51219			0.999996	0.994711	-0.00528538		-0.00528538	-0.528538
-60	1	0.981554	-0.0184474		-0.0184474	-1.84474			1	0.992782	-0.00722188		-0.00722188	-0.722188
-80	0.999999	0.978444	-0.0215552		-0.0215552	-2.15552			1.00001	0.992475	-0.00753021		-0.00753021	-0.753021
-100	1	0.975914	-0.0240875		-0.0240875	-2.40875			1	0.990705	-0.00929487		-0.00929486	-0.929486
-120	0.999994	0.972266	-0.027728		-0.027728	-2.7728			1	0.99061	-0.00939429		-0.00939429	-0.939429
-140	1	0.968822	-0.0311778		-0.0311777	-3.11777			1	0.989286	-0.0107166		-0.0107166	-1.07166
File 2	0 ATP								10µM ATP
voltage	baseline	F trace	∆F	average baseline	∆F/F	% ∆F/F			baseline	F trace	∆F	average baseline	∆F/F	% ∆F/F
40	1	1.00042	0.000420034	1	0.000420034	0.0420034			1	0.999453	-0.000546575	1	-0.000546574	-0.0546574
20	1	0.998853	-0.00114703		-0.00114703	-0.114703			1	0.999429	-0.000571072		-0.000571072	-0.0571072
0	1	0.99664	-0.00335997		-0.00335997	-0.335997			1	0.998777	-0.00122321		-0.00122321	-0.122321
-20	1	0.99655	-0.00345069		-0.00345069	-0.345069			1	0.998394	-0.00160587		-0.00160587	-0.160587
-40	1	0.995209	-0.00479096		-0.00479096	-0.479096			1	0.998153	-0.00184691		-0.00184691	-0.184691
-60	1	0.994375	-0.00562584		-0.00562584	-0.562584			1	0.996981	-0.00301951		-0.00301951	-0.301951
-80	1	0.993832	-0.00616753		-0.00616753	-0.616753			1	0.996948	-0.00305164		-0.00305164	-0.305164
-100	1	0.99151	-0.00848991		-0.00848991	-0.848991			1	0.996955	-0.00304484		-0.00304484	-0.304484
-120	1	0.991313	-0.0086869		-0.0086869	-0.86869			1	0.996726	-0.0032748		-0.0032748	-0.32748
-140	1	0.989776	-0.010224		-0.010224	-1.0224			1	0.996649	-0.00335103		-0.00335103	-0.335103
File 3	0 ATP								10µM ATP
voltage	baseline	F trace	∆F	average baseline	∆F/F	% ∆F/F			baseline	F trace	∆F	average baseline	∆F/F	% ∆F/F
40	0.999994	1.00331	0.00331384	1	0.00331384	0.331384			0.999999	1.0008	0.000799716	0.999998	0.000799717	0.0799717
20	1	0.999299	-0.000701785		-0.000701784	-0.0701784			0.999998	0.999883	-0.000114799		-0.000114799	-0.0114799
0	1	0.995297	-0.00470769		-0.00470769	-0.470769			1	0.998313	-0.00168663		-0.00168664	-0.168664
-20	1	0.992507	-0.00749403		-0.00749403	-0.749403			1	0.996993	-0.00300688		-0.00300688	-0.300688
-40	1	0.989475	-0.0105283		-0.0105283	-1.05283			0.999996	0.996091	-0.00390464		-0.00390465	-0.390465
-60	1.00001	0.986711	-0.0132946		-0.0132946	-1.32946			1	0.995732	-0.00426954		-0.00426955	-0.426955
-80	1	0.985517	-0.0144836		-0.0144836	-1.44836			1	0.994173	-0.00582683		-0.00582684	-0.582684
-100	0.999997	0.983842	-0.0161548		-0.0161548	-1.61548			0.999997	0.994101	-0.00589591		-0.00589592	-0.589592
-120	1	0.982764	-0.0172395		-0.0172394	-1.72394			0.999996	0.99302	-0.00697631		-0.00697632	-0.697632
-140	1	0.981904	-0.018096		-0.018096	-1.8096			0.999997	0.99247	-0.00752646		-0.00752647	-0.752647
File 4	0 ATP								10µM ATP
voltage	baseline	F trace	∆F	average baseline	∆F/F	% ∆F/F			baseline	F trace	∆F	average baseline	∆F/F	% ∆F/F
40	1	1.00176	0.00175393	1	0.00175392	0.175392			0.999999	1.00089	0.000887811	1	0.000887811	0.0887811
20	1.00001	0.998825	-0.00118017		-0.00118017	-0.118017			0.999999	0.999097	-0.000902176		-0.000902176	-0.0902176
0	1	0.996058	-0.00394195		-0.00394195	-0.394195			1	0.997919	-0.0020836		-0.0020836	-0.20836
-20	0.999999	0.993586	-0.0064131		-0.00641309	-0.641309			1	0.99697	-0.00302923		-0.00302923	-0.302923
-40	0.999998	0.991219	-0.00877875		-0.00877874	-0.877874			1	0.995715	-0.00428569		-0.00428569	-0.428569
-60	1.00001	0.98856	-0.0114494		-0.0114494	-1.14494			1	0.994455	-0.00554609		-0.00554609	-0.554609
-80	1	0.987372	-0.01263		-0.01263	-1.263			0.999999	0.994073	-0.00592685		-0.00592685	-0.592685
-100	0.999999	0.985659	-0.0143404		-0.0143404	-1.43404			0.999997	0.993419	-0.00657892		-0.00657892	-0.657892
-120	0.999998	0.983725	-0.016273		-0.0162729	-1.62729			0.999999	0.992798	-0.00720066		-0.00720066	-0.720066
-140	1	0.982687	-0.0173128		-0.0173127	-1.73127			1	0.992038	-0.00796294		-0.00796294	-0.796294

## Sheet: R313FA337Anap 0 30µM; Fig. 4E
Figure 4E
A337Anap/R313F
∆F/F at 440nm
0 ATP	30µM ATP
-1.3357	-0.767246
-3.33022	-2.21956
-3.04234	-1.72183
-2.3348	-1.40573
-3.21763	-2.48935
-1.84346	-1.08255
-2.0442	-1.54067
-4.12586	-2.28998
File 1	0 ATP								30µM ATP
voltage	baseline	F trace	∆F	average baseline	∆F/F	% ∆F/F			baseline	F trace	∆F	average baseline	∆F/F	% ∆F/F
40	1.00006	0.999378	-0.000685096	1.00001	-0.000685092	-0.0685092			0.999997	1.001	0.00100076	1	0.00100076	0.100076
20	0.999975	0.998918	-0.00105739		-0.00105738	-0.105738			1	0.999668	-0.000333428		-0.000333427	-0.0333427
0	1.00002	0.99917	-0.000848353		-0.000848348	-0.0848348			1.00003	0.998235	-0.00179636		-0.00179636	-0.179636
-20	0.999937	0.995097	-0.00483912		-0.00483909	-0.483909			0.999982	0.996264	-0.00371802		-0.003718	-0.3718
-40	1.00005	0.992883	-0.00716639		-0.00716634	-0.716634			1.00001	0.995477	-0.00453025		-0.00453023	-0.453023
-60	1.00007	0.992092	-0.00797373		-0.00797368	-0.797368			0.999982	0.995065	-0.00491649		-0.00491647	-0.491647
-80	0.999977	0.990018	-0.00995839		-0.00995832	-0.995832			1.00003	0.994007	-0.00602144		-0.00602141	-0.602141
-100	1.00001	0.989219	-0.0107903		-0.0107902	-1.07902			1.00001	0.993141	-0.00687188		-0.00687185	-0.687185
-120	0.999963	0.987955	-0.0120079		-0.0120078	-1.20078			1.00001	0.993758	-0.00625223		-0.0062522	-0.62522
-140	1.00001	0.986649	-0.0133571		-0.013357	-1.3357			0.999991	0.992318	-0.00767249		-0.00767246	-0.767246
File 2	0 ATP								30µM ATP
voltage	baseline	F trace	∆F	average baseline	∆F/F	% ∆F/F			baseline	F trace	∆F	average baseline	∆F/F	% ∆F/F
40	1.00006	1.0048	0.00474024	1	0.00474023	0.474023			0.999952	1.00291	0.00295764	0.999992	0.00295767	0.295767
20	0.99995	0.999297	-0.000653327		-0.000653325	-0.0653325			1.00002	0.999692	-0.000323653		-0.000323656	-0.0323656
0	0.999859	0.995818	-0.00404042		-0.00404041	-0.404041			0.999999	0.996123	-0.00387555		-0.00387558	-0.387558
-20	1.00004	0.991376	-0.00866848		-0.00866846	-0.866846			1.00009	0.99255	-0.00754422		-0.00754428	-0.754428
-40	1.00005	0.985706	-0.0143399		-0.0143398	-1.43398			1.00004	0.989768	-0.0102721		-0.0102722	-1.02722
-60	0.999973	0.981035	-0.0189375		-0.0189374	-1.89374			1.00001	0.986811	-0.0132		-0.0132001	-1.32001
-80	0.999921	0.97816	-0.021761		-0.021761	-2.1761			0.99998	0.983499	-0.0164815		-0.0164816	-1.64816
-100	1.00002	0.973762	-0.0262533		-0.0262533	-2.62533			0.999952	0.981307	-0.018645		-0.0186451	-1.86451
-120	1.00012	0.971081	-0.0290351		-0.029035	-2.9035			0.999983	0.979698	-0.0202852		-0.0202853	-2.02853
-140	1.00004	0.966738	-0.0333023		-0.0333022	-3.33022			0.999896	0.9777	-0.0221954		-0.0221956	-2.21956
File 3	0 ATP								30µM ATP
voltage	baseline	F trace	∆F	average baseline	∆F/F	% ∆F/F			baseline	F trace	∆F	average baseline	∆F/F	% ∆F/F
40	0.999995	1.00385	0.00385034	0.999999	0.00385034	0.385034			1	1.00213	0.00212562	1	0.00212562	0.212562
20	0.999998	0.998296	-0.00170171		-0.00170171	-0.170171			0.999996	0.998847	-0.00114948		-0.00114948	-0.114948
0	1	0.994448	-0.00555503		-0.00555504	-0.555504			0.999997	0.996931	-0.00306559		-0.00306559	-0.306559
-20	1	0.990668	-0.00933444		-0.00933445	-0.933445			1	0.994737	-0.00526416		-0.00526416	-0.526416
-40	1	0.986536	-0.0134643		-0.0134643	-1.34643			1	0.991949	-0.00805002		-0.00805003	-0.805003
-60	1	0.983348	-0.0166537		-0.0166537	-1.66537			0.999997	0.990002	-0.00999504		-0.00999505	-0.999505
-80	0.999993	0.97997	-0.0200228		-0.0200228	-2.00228			1	0.988116	-0.0118851		-0.0118851	-1.18851
-100	1	0.976683	-0.0233189		-0.023319	-2.3319			1	0.986296	-0.0137084		-0.0137084	-1.37084
-120	0.999996	0.973476	-0.0265193		-0.0265193	-2.65193			0.999999	0.984677	-0.0153222		-0.0153222	-1.53222
-140	1	0.969576	-0.0304234		-0.0304234	-3.04234			1	0.982782	-0.0172182		-0.0172182	-1.72182
File 4	0 ATP								30µM ATP
voltage	baseline	F trace	∆F	average baseline	∆F/F	% ∆F/F			baseline	F trace	∆F	average baseline	∆F/F	% ∆F/F
40	1	1.00144	0.00143987	1	0.00143987	0.143987			1	1.00143	0.00142825	0.999999	0.00142825	0.142825
20	0.999997	0.998901	-0.00109595		-0.00109595	-0.109595			0.999998	0.999077	-0.00092119		-0.00092119	-0.092119
0	1.00001	0.995676	-0.00433075		-0.00433075	-0.433075			0.999999	0.997805	-0.00219369		-0.00219369	-0.219369
-20	1	0.992284	-0.00771677		-0.00771676	-0.771676			1	0.995104	-0.00489789		-0.00489789	-0.489789
-40	0.999999	0.988785	-0.0112134		-0.0112133	-1.12133			1	0.993371	-0.00663018		-0.00663019	-0.663019
-60	1	0.986716	-0.0132862		-0.0132861	-1.32861			0.999996	0.991273	-0.00872344		-0.00872344	-0.872344
-80	1	0.983936	-0.0160673		-0.0160673	-1.60673			0.999998	0.990309	-0.00968903		-0.00968904	-0.968904
-100	1	0.981916	-0.0180865		-0.0180865	-1.80865			1	0.988587	-0.011413		-0.011413	-1.1413
-120	1.00001	0.978757	-0.0212496		-0.0212496	-2.12496			1	0.987357	-0.0126436		-0.0126436	-1.26436
-140	1	0.976654	-0.0233478		-0.0233477	-2.33477			1	0.985943	-0.0140572		-0.0140572	-1.40572
File 5	0 ATP								30µM ATP
voltage	baseline	F trace	∆F	average baseline	∆F/F	% ∆F/F			baseline	F trace	∆F	average baseline	∆F/F	% ∆F/F
40	1.00001	1.00499	0.00497603	1	0.00497603	0.497603			1	1.00268	0.00268364	1.00001	0.00268362	0.268362
20	1.00003	0.998545	-0.001486		-0.001486	-0.1486			1.00001	0.999066	-0.000942528		-0.000942523	-0.0942523
0	0.999987	0.99451	-0.00547707		-0.00547707	-0.547707			1.00001	0.995089	-0.00491726		-0.00491724	-0.491724
-20	0.99999	0.990434	-0.00955641		-0.0095564	-0.95564			1.00001	0.991792	-0.00821608		-0.00821603	-0.821603
-40	1.00003	0.985933	-0.0140933		-0.0140933	-1.40933			1.00001	0.988936	-0.0110704		-0.0110704	-1.10704
-60	0.999995	0.982125	-0.0178698		-0.0178698	-1.78698			1.00001	0.985844	-0.0141621		-0.014162	-1.4162
-80	0.999985	0.978177	-0.0218075		-0.0218075	-2.18075			1.00001	0.982227	-0.0177802		-0.0177801	-1.77801
-100	1	0.973523	-0.0264806		-0.0264806	-2.64806			1.00001	0.979955	-0.0200536		-0.0200534	-2.00534
-120	0.999978	0.971251	-0.0287276		-0.0287276	-2.87276			1	0.977058	-0.0229465		-0.0229463	-2.29463
-140	1	0.967825	-0.0321761		-0.032176	-3.2176			1	0.975109	-0.0248933		-0.0248932	-2.48932
File 6	0 ATP								30µM ATP
voltage	baseline	F trace	∆F	average baseline	∆F/F	% ∆F/F			baseline	F trace	∆F	average baseline	∆F/F	% ∆F/F
40	1	1.00188	0.00187469	1	0.00187469	0.187469			1	1.00051	0.00050509	1	0.00050509	0.050509
20	1	0.998867	-0.00113446		-0.00113446	-0.113446			1	0.999177	-0.000824809		-0.000824809	-0.0824809
0	1	0.996685	-0.00331497		-0.00331497	-0.331497			0.999998	0.997882	-0.0021162		-0.0021162	-0.21162
-20	1	0.993353	-0.00664717		-0.00664717	-0.664717			1	0.995789	-0.0042122		-0.0042122	-0.42122
-40	1	0.991937	-0.0080632		-0.0080632	-0.80632			1	0.994584	-0.0054158		-0.00541579	-0.541579
-60	1	0.988726	-0.0112741		-0.0112741	-1.12741			1	0.993583	-0.00641721		-0.00641721	-0.641721
-80	0.999999	0.987033	-0.0129656		-0.0129656	-1.29656			1	0.992637	-0.00736398		-0.00736397	-0.736397
-100	0.999999	0.985221	-0.0147783		-0.0147783	-1.47783			1	0.991425	-0.00857466		-0.00857466	-0.857466
-120	1	0.983589	-0.0164104		-0.0164103	-1.64103			1	0.989982	-0.0100198		-0.0100198	-1.00198
-140	1	0.981567	-0.0184345		-0.0184345	-1.84345			1	0.989176	-0.0108255		-0.0108254	-1.08254
File 7	0 ATP								30µM ATP
voltage	baseline	F trace	∆F	average baseline	∆F/F	% ∆F/F			baseline	F trace	∆F	average baseline	∆F/F	% ∆F/F
40	1	1.00143	0.00142646	1	0.00142646	0.142646			1	1.00135	0.00134957	1	0.00134957	0.134957
20	1	0.998242	-0.00175852		-0.00175852	-0.175852			1	0.998778	-0.00122285		-0.00122285	-0.122285
0	0.999998	0.995592	-0.00440645		-0.00440645	-0.440645			1	0.996354	-0.00364912		-0.00364911	-0.364911
-20	1	0.992993	-0.00700885		-0.00700885	-0.700885			0.999999	0.994605	-0.0053941		-0.0053941	-0.53941
-40	0.999998	0.99021	-0.00978822		-0.00978822	-0.978822			1	0.992812	-0.00718993		-0.00718992	-0.718992
-60	0.999998	0.987488	-0.0125099		-0.0125099	-1.25099			1	0.990565	-0.00943631		-0.0094363	-0.94363
-80	0.999998	0.984584	-0.0154144		-0.0154144	-1.54144			1	0.988833	-0.011167		-0.011167	-1.1167
-100	1	0.982266	-0.0177342		-0.0177342	-1.77342			1	0.987102	-0.0128981		-0.0128981	-1.28981
-120	1	0.980135	-0.0198656		-0.0198656	-1.98656			0.999999	0.985408	-0.0145918		-0.0145918	-1.45918
-140	0.999999	0.979557	-0.0204418		-0.0204418	-2.04418			1	0.984595	-0.0154065		-0.0154065	-1.54065
File 8	0 ATP								30µM ATP
voltage	baseline	F trace	∆F	average baseline	∆F/F	% ∆F/F			baseline	F trace	∆F	average baseline	∆F/F	% ∆F/F
40	0.999997	1.00401	0.00401616	1	0.00401616	0.401616			0.999999	1.00269	0.00269395	1	0.00269395	0.269395
20	0.999999	0.998594	-0.00140524		-0.00140524	-0.140524			1	0.99921	-0.000790477		-0.000790477	-0.0790477
0	0.999999	0.992528	-0.00747013		-0.00747013	-0.747013			0.999998	0.995142	-0.00485575		-0.00485575	-0.485575
-20	1	0.986747	-0.0132571		-0.0132571	-1.32571			0.999999	0.991336	-0.008663		-0.008663	-0.8663
-40	0.999999	0.982048	-0.0179508		-0.0179508	-1.79508			1	0.989352	-0.0106506		-0.0106506	-1.06506
-60	1	0.974586	-0.0254146		-0.0254146	-2.54146			1	0.985623	-0.0143791		-0.0143791	-1.43791
-80	0.999999	0.971358	-0.028641		-0.028641	-2.8641			1	0.982501	-0.0175008		-0.0175008	-1.75008
-100	1	0.966994	-0.0330086		-0.0330086	-3.30086			0.999999	0.980979	-0.01902		-0.01902	-1.902
-120	1	0.963249	-0.0367531		-0.0367531	-3.67531			0.999998	0.978906	-0.0210921		-0.0210921	-2.10921
-140	1	0.958743	-0.0412583		-0.0412583	-4.12583			0.999997	0.977098	-0.0228996		-0.0228996	-2.28996

## Sheet: R313FA337Anap 0 100µM; Fig. 4H
Figure 4H
A337Anap/R313F
∆F/F at 440nm
0 ATP	100µM ATP
-3.79272	-1.84964
-2.3348	-0.712865
-1.67698	-0.761712
-0.914181	-0.491766
-2.02874	-0.779349
-3.32074	-1.18418
-2.03239	-0.775683
-3.31432	-0.689899
File 1	0 ATP								100µM ATP
voltage	baseline	F trace	∆F	average baseline	∆F/F	% ∆F/F			baseline	F trace	∆F	average baseline	∆F/F	% ∆F/F
40	0.999995	1.00591	0.00591284	1	0.00591283	0.591283			0.999999	1.00274	0.00274169	1	0.00274169	0.274169
20	0.999998	0.998748	-0.00125021		-0.0012502	-0.12502			1	0.999518	-0.000482321		-0.000482321	-0.0482321
0	1.00002	0.99451	-0.00550514		-0.00550513	-0.550513			1	0.996412	-0.00358826		-0.00358826	-0.358826
-20	0.999999	0.987666	-0.0123337		-0.0123337	-1.23337			1	0.992882	-0.00712168		-0.00712168	-0.712168
-40	0.999998	0.983452	-0.0165458		-0.0165458	-1.65458			1	0.990572	-0.00942993		-0.00942993	-0.942993
-60	1	0.977717	-0.0222843		-0.0222843	-2.22843			1.00001	0.988393	-0.0116125		-0.0116125	-1.16125
-80	1.00001	0.974563	-0.0254459		-0.0254459	-2.54459			1	0.985103	-0.0148983		-0.0148983	-1.48983
-100	0.999996	0.969757	-0.0302386		-0.0302386	-3.02386			0.999992	0.984665	-0.0153275		-0.0153275	-1.53275
-120	1.00001	0.9669	-0.033106		-0.0331059	-3.31059			1	0.982605	-0.0173958		-0.0173958	-1.73958
-140	1.00001	0.96208	-0.0379269		-0.0379268	-3.79268			1	0.981505	-0.0184962		-0.0184962	-1.84962
File 2	0 ATP								100µM ATP
voltage	baseline	F trace	∆F	average baseline	∆F/F	% ∆F/F			baseline	F trace	∆F	average baseline	∆F/F	% ∆F/F
40	1	1.00144	0.00143987	1	0.00143987	0.143987			1	1.00093	0.000933528	1	0.000933528	0.0933528
20	0.999997	0.998901	-0.00109595		-0.00109595	-0.109595			0.999996	0.999632	-0.000364184		-0.000364184	-0.0364184
0	1.00001	0.995676	-0.00433075		-0.00433075	-0.433075			1	0.998846	-0.00115591		-0.00115591	-0.115591
-20	1	0.992284	-0.00771677		-0.00771676	-0.771676			1	0.997711	-0.00229323		-0.00229323	-0.229323
-40	0.999999	0.988785	-0.0112134		-0.0112133	-1.12133			1	0.996681	-0.00331903		-0.00331902	-0.331902
-60	1	0.986716	-0.0132862		-0.0132861	-1.32861			0.999997	0.995905	-0.00409204		-0.00409204	-0.409204
-80	1	0.983936	-0.0160673		-0.0160673	-1.60673			1	0.99533	-0.00467199		-0.00467199	-0.467199
-100	1	0.981916	-0.0180865		-0.0180865	-1.80865			1	0.994795	-0.00520897		-0.00520897	-0.520897
-120	1.00001	0.978757	-0.0212496		-0.0212496	-2.12496			0.999998	0.993905	-0.00609297		-0.00609296	-0.609296
-140	1	0.976654	-0.0233478		-0.0233477	-2.33477			1	0.992872	-0.0071286		-0.00712859	-0.712859
File 3	0 ATP								100µM ATP
voltage	baseline	F trace	∆F	average baseline	∆F/F	% ∆F/F			baseline	F trace	∆F	average baseline	∆F/F	% ∆F/F
40	1	1.00152	0.00151575	1.00001	0.00151574	0.151574			1	1.00061	0.000610948	1	0.000610947	0.0610947
20	1.00002	0.998674	-0.00134182		-0.00134181	-0.134181			0.999995	0.999654	-0.000340521		-0.000340521	-0.0340521
0	1.00001	0.997217	-0.002792		-0.00279199	-0.279199			0.999997	0.998048	-0.00194889		-0.00194889	-0.194889
-20	1.00001	0.994274	-0.00573266		-0.00573263	-0.573263			1	0.996923	-0.00307989		-0.00307989	-0.307989
-40	1.00001	0.993261	-0.0067454		-0.00674536	-0.674536			0.999998	0.996152	-0.00384641		-0.0038464	-0.38464
-60	1	0.989783	-0.0102191		-0.010219	-1.0219			1	0.994851	-0.00514901		-0.005149	-0.5149
-80	1	0.988986	-0.0110171		-0.011017	-1.1017			1	0.994459	-0.00554425		-0.00554424	-0.554424
-100	1.00001	0.98768	-0.0123254		-0.0123253	-1.23253			1	0.992883	-0.00712138		-0.00712138	-0.712138
-120	0.999994	0.985494	-0.0144995		-0.0144995	-1.44995			1.00001	0.992866	-0.00714058		-0.00714057	-0.714057
-140	1.00001	0.98324	-0.0167696		-0.0167696	-1.67696			0.999998	0.992381	-0.00761706		-0.00761705	-0.761705
File 4	0 ATP								100µM ATP
voltage	baseline	F trace	∆F	average baseline	∆F/F	% ∆F/F			baseline	F trace	∆F	average baseline	∆F/F	% ∆F/F
40	1	0.999142	-0.000858128	1	-0.000858127	-0.0858127			1	0.999937	-6.25849e-05	1	-6.25849e-05	-0.00625849
20	1	0.997689	-0.00231296		-0.00231296	-0.231296			1	0.998811	-0.00118858		-0.00118858	-0.118858
0	1	0.995905	-0.0040977		-0.0040977	-0.40977			1	0.99833	-0.00166988		-0.00166988	-0.166988
-20	0.999999	0.996054	-0.0039441		-0.0039441	-0.39441			1	0.998138	-0.00186116		-0.00186116	-0.186116
-40	1	0.994601	-0.00540167		-0.00540167	-0.540167			1	0.996961	-0.00303942		-0.00303942	-0.303942
-60	1	0.994312	-0.00568956		-0.00568956	-0.568956			1	0.996026	-0.00397414		-0.00397414	-0.397414
-80	1	0.993745	-0.00625801		-0.00625801	-0.625801			1	0.995522	-0.00447804		-0.00447804	-0.447804
-100	1	0.991308	-0.00869352		-0.00869351	-0.869351			1	0.995383	-0.00461733		-0.00461733	-0.461733
-120	0.999997	0.991776	-0.00822031		-0.00822031	-0.822031			1	0.994504	-0.00549561		-0.00549561	-0.549561
-140	0.999998	0.990856	-0.00914174		-0.00914174	-0.914174			1	0.995082	-0.00491762		-0.00491762	-0.491762
File 5	0 ATP								100µM ATP
voltage	baseline	F trace	∆F	average baseline	∆F/F	% ∆F/F			baseline	F trace	∆F	average baseline	∆F/F	% ∆F/F
40	1	1.00068	0.000675082	1	0.000675082	0.0675082			0.999998	1.00046	0.000464857	1	0.000464857	0.0464857
20	1	0.998253	-0.0017463		-0.0017463	-0.17463			0.999999	0.998526	-0.00147259		-0.00147259	-0.147259
0	0.999998	0.995276	-0.00472212		-0.00472212	-0.472212			1	0.99755	-0.00245136		-0.00245136	-0.245136
-20	1	0.992599	-0.00740367		-0.00740367	-0.740367			1	0.996354	-0.00364602		-0.00364602	-0.364602
-40	0.999999	0.990441	-0.00955802		-0.00955802	-0.955802			1	0.994861	-0.00513875		-0.00513876	-0.513876
-60	0.999998	0.98767	-0.0123275		-0.0123275	-1.23275			0.999999	0.994898	-0.00510103		-0.00510103	-0.510103
-80	1	0.986012	-0.0139874		-0.0139874	-1.39874			1	0.993784	-0.00621694		-0.00621695	-0.621695
-100	1	0.98322	-0.0167813		-0.0167813	-1.67813			1	0.993477	-0.00652379		-0.00652379	-0.652379
-120	1	0.980702	-0.0192987		-0.0192987	-1.92987			0.999997	0.992666	-0.00733083		-0.00733084	-0.733084
-140	1	0.979715	-0.0202873		-0.0202873	-2.02873			1	0.992208	-0.00779343		-0.00779343	-0.779343
File 6	0 ATP								100µM ATP
voltage	baseline	F trace	∆F	average baseline	∆F/F	% ∆F/F			baseline	F trace	∆F	average baseline	∆F/F	% ∆F/F
40	1	1.00345	0.00344825	1	0.00344825	0.344825			1	1.00109	0.00109386	1	0.00109386	0.109386
20	1	0.998217	-0.00178224		-0.00178224	-0.178224			1	0.99917	-0.000829637		-0.000829637	-0.0829637
0	1	0.994233	-0.00576848		-0.00576848	-0.576848			1	0.996672	-0.00332797		-0.00332797	-0.332797
-20	1	0.989549	-0.010452		-0.010452	-1.0452			1	0.995361	-0.0046401		-0.0046401	-0.46401
-40	1	0.985669	-0.0143313		-0.0143313	-1.43313			0.999998	0.993855	-0.00614327		-0.00614327	-0.614327
-60	1	0.981238	-0.0187628		-0.0187628	-1.87628			1	0.991459	-0.00854057		-0.00854057	-0.854057
-80	1	0.97686	-0.0231411		-0.0231411	-2.31411			1	0.990695	-0.00930464		-0.00930464	-0.930464
-100	0.999998	0.973463	-0.0265356		-0.0265356	-2.65356			1	0.989377	-0.0106234		-0.0106234	-1.06234
-120	1	0.970244	-0.0297574		-0.0297574	-2.97574			0.999999	0.988483	-0.0115155		-0.0115155	-1.15155
-140	1	0.966793	-0.0332072		-0.0332072	-3.32072			1	0.98816	-0.0118417		-0.0118417	-1.18417
File 7	0 ATP								100µM ATP
voltage	baseline	F trace	∆F	average baseline	∆F/F	% ∆F/F			baseline	F trace	∆F	average baseline	∆F/F	% ∆F/F
40	0.999999	1.00129	0.00129211	1	0.00129211	0.129211			1	1.0009	0.000893116	1	0.000893116	0.0893116
20	0.999999	0.998451	-0.00154859		-0.00154859	-0.154859			1	0.999258	-0.000742972		-0.000742972	-0.0742972
0	1	0.994705	-0.00529557		-0.00529558	-0.529558			1	0.997787	-0.00221485		-0.00221485	-0.221485
-20	1	0.993416	-0.0065859		-0.0065859	-0.65859			0.999998	0.996342	-0.0036552		-0.00365519	-0.365519
-40	1	0.989482	-0.010519		-0.010519	-1.0519			1	0.996234	-0.00376683		-0.00376683	-0.376683
-60	0.999998	0.988245	-0.0117533		-0.0117533	-1.17533			1	0.994569	-0.00543362		-0.00543362	-0.543362
-80	1	0.984759	-0.0152407		-0.0152407	-1.52407			1	0.994289	-0.00571126		-0.00571126	-0.571126
-100	1	0.983997	-0.0160043		-0.0160043	-1.60043			1	0.993724	-0.00627601		-0.00627601	-0.627601
-120	0.999999	0.980602	-0.0193967		-0.0193967	-1.93967			0.999999	0.992912	-0.00708681		-0.00708681	-0.708681
-140	0.999999	0.979675	-0.0203238		-0.0203238	-2.03238			0.999998	0.992242	-0.00775677		-0.00775677	-0.775677
File 8	0 ATP								100µM ATP
voltage	baseline	F trace	∆F	average baseline	∆F/F	% ∆F/F			baseline	F trace	∆F	average baseline	∆F/F	% ∆F/F
40	0.999998	1.00333	0.00332719	1	0.00332719	0.332719			1	1.0017	0.00169528	1	0.00169527	0.169527
20	0.999999	0.998834	-0.00116569		-0.00116569	-0.116569			1	0.99968	-0.000321984		-0.000321984	-0.0321984
0	1	0.994293	-0.00570953		-0.00570953	-0.570953			1	0.998076	-0.00192571		-0.00192571	-0.192571
-20	0.999998	0.990566	-0.00943172		-0.00943172	-0.943172			1	0.99685	-0.00315338		-0.00315338	-0.315338
-40	1	0.985387	-0.014614		-0.014614	-1.4614			0.999998	0.996051	-0.00394636		-0.00394636	-0.394636
-60	1	0.982135	-0.0178652		-0.0178652	-1.78652			1	0.995537	-0.00446332		-0.00446331	-0.446331
-80	1	0.978355	-0.0216443		-0.0216443	-2.16443			1	0.994857	-0.0051446		-0.00514459	-0.514459
-100	1	0.974197	-0.0258042		-0.0258042	-2.58042			0.999999	0.994153	-0.0058462		-0.0058462	-0.58462
-120	0.999999	0.970185	-0.0298135		-0.0298135	-2.98135			1	0.994197	-0.00580645		-0.00580644	-0.580644
-140	1	0.966859	-0.0331429		-0.0331429	-3.31429			0.999997	0.993098	-0.00689894		-0.00689893	-0.689893
