# Supplementary material for: Voltage-clamp fluorometry analysis of structural rearrangements of ATP-gated channel P2X2 upon hyperpolarization
Source: eLife. 2021 May 19;10:e65822. doi: 10.7554/eLife.65822 (PMC8184218; doi:10.7554/eLife.65822)
Supplement: Figure 5—figure supplement 1—source data 1. [file elife-65822-fig5-figsupp1-data1.xlsx]

## Sheet: Figure 5—figure supplement 1
Figure 5—figure supplement 1
K308R/A337Anap
	(current amplitude in µA at -160 mV)
oocyte	current amplitude (ATP 300 µM)	current amplitude (Suramin 300 µM)
1	-18.8482	-6.18908
2	-19.6345	-4.49895
3	-23.0213	-4.47621
4	-23.5395	-3.94903
5	-15.9206	-4.10461
	(current amplitude in µA at -160 mV)
oocyte	current amplitude (ATP 300 µM)	current amplitude (PPADS 1 mM)
1	-20.3833	-6.65014
2	-23.6837	-8.48927
3	-14.2338	-5.65054
4	-14.1658	-3.02902
5	-17.7612	-6.38865
Holding potential = +20 mV
