# Supplementary material for: Voltage-clamp fluorometry analysis of structural rearrangements of ATP-gated channel P2X2 upon hyperpolarization
Source: eLife. 2021 May 19;10:e65822. doi: 10.7554/eLife.65822 (PMC8184218; doi:10.7554/eLife.65822)
Supplement: Figure 5—figure supplement 2—source data 1. [file elife-65822-fig5-figsupp2-data1.xlsx]

## Sheet: Figure 5—figure supplement 2BCD
Figure 5—figure supplement 2B, C, D
K308R/A337Anap			30µM ATP	n=3
1										Figure 5—figure supplement 2B		Fsteady-state
∆Ffast/Fo	% ∆Ffast/Fo	∆Fsteadystate/Fo	% ∆Fsteadystate/Fo	∆Fslow/Fo	% ∆Fslow/Fo	∆voltage				average ∆voltage	average % ∆Fsteady-state/F	SD	s.e.m
0.00408756	0.408756	0.00448547	0.448547	0.000397907	0.0397907	18.8293				19.338	0.626904	0.155433	0.0897391
-0.00035711	-0.035711	-8.71718e-07	-8.71718e-05	0.000356238	0.0356238	0				0	-0.0334118	0.0467671	0.027001
-0.00467439	-0.467439	-0.00427931	-0.427931	0.000395082	0.0395082	-18.8904				-19.2159	-0.663876	0.215837	0.124614
-0.00754554	-0.754554	-0.00880063	-0.880063	-0.00125509	-0.125509	-37.7502				-38.3708	-1.30156	0.379341	0.219012
-0.0127765	-1.27765	-0.0125451	-1.25451	0.000231411	0.0231411	-56.3965				-57.3425	-1.84435	0.525276	0.303269
-0.0146407	-1.46407	-0.0157597	-1.57597	-0.00111896	-0.111896	-74.7681				-76.1414	-2.34038	0.692233	0.399661
-0.0191556	-1.91556	-0.019072	-1.9072	8.36272e-05	0.00836272	-92.8955				-94.696	-2.82556	0.837926	0.483777
-0.022603	-2.2603	-0.0219655	-2.19655	0.00063752	0.063752	-110.657				-112.895	-3.24392	0.977586	0.564409
-0.0253115	-2.53115	-0.0244172	-2.44172	0.000894252	0.0894252	-128.082				-130.666	-3.61071	1.1057	0.638376
-0.0287543	-2.87543	-0.0265187	-2.65187	0.00223559	0.223559	-144.928				-147.929	-3.9314	1.20854	0.697749
-0.03198	-3.198	-0.0280999	-2.80999	0.00388011	0.388011	-160.797				-164.612	-4.1836	1.32636	0.765775
2										Figure 5—figure supplement 2C		Ffast
∆Ffast/Fo	% ∆Ffast/Fo	∆Fsteadystate/Fo	% ∆Fsteadystate/Fo	∆Fslow/Fo	% ∆Fslow/Fo	∆voltage				average ∆voltage	average % ∆Ffast/F	SD	s.e.m
0.00872469	0.872469	0.00733428	0.733428	-0.00139041	-0.139041	19.4702				19.338	0.684376	0.243933	0.140835
-0.000195259	-0.0195259	-0.000132736	-0.0132736	6.25225e-05	0.00625225	0				0	-0.0103271	0.0310236	0.0179115
-0.00664076	-0.664076	-0.00712328	-0.712328	-0.000482521	-0.0482521	-19.1956				-19.2159	-0.658545	0.188401	0.108774
-0.0142112	-1.42112	-0.0140907	-1.40907	0.000120511	0.0120511	-38.1165				-38.3708	-1.22806	0.412386	0.238091
-0.0202213	-2.02213	-0.0201683	-2.01683	5.29513e-05	0.00529513	-56.8237				-57.3425	-1.81178	0.466036	0.269066
-0.0255282	-2.55282	-0.0252024	-2.52024	0.000325801	0.0325801	-75.2563				-76.1414	-2.33235	0.781719	0.451326
-0.0316307	-3.16307	-0.0302097	-3.02097	0.00142098	0.142098	-93.3228				-94.696	-2.82369	0.794783	0.458868
-0.0360793	-3.60793	-0.0340299	-3.40299	0.00204941	0.204941	-110.718				-112.895	-3.33103	0.962628	0.555773
-0.040177	-4.0177	-0.037506	-3.7506	0.00267104	0.267104	-127.197				-130.666	-3.74485	1.10289	0.636755
-0.0439075	-4.39075	-0.040888	-4.0888	0.00301951	0.301951	-142.7				-147.929	-4.11509	1.1274	0.650906
-0.0484666	-4.84666	-0.0428379	-4.28379	0.00562879	0.562879	-157.715				-164.612	-4.59599	1.29104	0.745383
3										Figure 5—figure supplement 2D		Fslow
∆Ffast/Fo	% ∆Ffast/Fo	∆Fsteadystate/Fo	% ∆Fsteadystate/Fo	∆Fslow/Fo	% ∆Fslow/Fo	∆voltage				average ∆voltage	average % ∆Fslow/F	SD	s.e.m
0.00771904	0.771904	0.00698736	0.698736	-0.000731674	-0.0731674	19.7144				19.338	-0.0574725	0.0904429	0.0522173
0.000242557	0.0242557	-0.000868744	-0.0868744	-0.0011113	-0.11113	0				0	-0.0230847	0.077651	0.0448318
-0.0084412	-0.84412	-0.00851369	-0.851369	-7.24914e-05	-0.00724914	-19.5618				-19.2159	-0.00533101	0.0439116	0.0253524
-0.0150849	-1.50849	-0.0161553	-1.61553	-0.00107041	-0.107041	-39.2456				-38.3708	-0.0734996	0.0746623	0.0431063
-0.0213557	-2.13557	-0.0226169	-2.26169	-0.00126117	-0.126117	-58.8074				-57.3425	-0.0325603	0.0815125	0.0470613
-0.0298016	-2.98016	-0.0292493	-2.92493	0.000552308	0.0552308	-78.3997				-76.1414	-0.00802831	0.090662	0.0523438
-0.0339244	-3.39244	-0.0354851	-3.54851	-0.00156071	-0.156071	-97.8699				-94.696	-0.00187022	0.149348	0.086226
-0.0412486	-4.12486	-0.0413221	-4.13221	-7.34776e-05	-0.00734776	-117.31				-112.895	0.087115	0.108055	0.0623859
-0.0468571	-4.68571	-0.0463981	-4.63981	0.00045903	0.045903	-136.719				-130.666	0.134144	0.117185	0.0676569
-0.0507911	-5.07911	-0.0505352	-5.05352	0.000255827	0.0255827	-156.158				-147.929	0.183698	0.142431	0.0822325
-0.0574332	-5.74332	-0.0545703	-5.45703	0.00286284	0.286284	-175.323				-164.612	0.412391	0.1399	0.0807713

## Sheet: Figure 5—figure supplement 2E
Figure 5—figure supplement 2E
K308R/A337Anap
30µM ATP
1
Voltage	τ current (ms)	τ Fluorescence			Voltage	Average τ current (ms)	SD	s.e.m	Average τ Fluorescence	SD	s.e.m
-60	73.3762				-60	58.1129	20.3538	11.7513
-80	49.4352				-80	42.3939	9.34863	5.39743
-100	41.4226				-100	36.3509	6.1299	3.5391
-120	37.0404	68.5887			-120	33.4848	4.70838	2.71838	96.4316	24.1162	13.9235
-140	33.6968	46.3808			-140	31.4072	4.30821	2.48735	61.345	15.0799	8.7064
-160	31.3993	68.1028			-160	29.8964	4.88163	2.81841	70.4125	5.63904	3.2557
2
Voltage	τ current (ms)	τ Fluorescence
-60	35.0038
-80	31.7872
-100	29.5391
-120	28.1451	109.937
-140	26.4377	61.1162
-160	24.44	66.2949
3
Voltage	τ current (ms)	τ Fluorescence
-60	65.9588
-80	45.9593
-100	38.0911
-120	35.2689	110.769
-140	34.0873	76.538
-160	33.8499	76.8397

## Sheet: Figure 5—figure supplement 2F
Figure 5—figure supplement 2F
K308R/A337Anap
300µM ATP
1
Voltage	τ current (ms)	τ Fluorescence			Voltage	Average τ current (ms)	SD	s.e.m	Average τ Fluorescence	SD	s.e.m
-60	20.129				-60	21.098	6.05469	2.28846
-80	17.5548				-80	19.0723	2.6676	1.00826
-100	16.2194				-100	18.7324	3.23374	1.22224
-120	15.0807	23.8121			-120	18.7605	3.90874	1.47736	42.8402	40.8164	15.4271
-140	14.2088	33.1694			-140	18.6587	3.93754	1.48825	63.9482	35.7386	13.5079
-160	13.1361	18.5823			-160	18.1235	3.61048	1.36463	26.9046	9.6412	3.64403
2
Voltage	τ current (ms)	τ Fluorescence
-60	15.5176
-80	15.8782
-100	15.9694
-120	15.8669	16.4157
-140	15.3228	127.217
-160	13.9109	27.5772
4
Voltage	τ current (ms)	τ Fluorescence
-60	18.9448
-80	22.3645
-100	25.3086
-120	26.9411	-11.687
-140	26.4505	59.8236
-160	23.747	40.4353
5
Voltage	τ current (ms)	τ Fluorescence
-60	18.0275
-80	17.5666
-100	17.6251
-120	18.284	36.5837
-140	18.8544	91.2903
-160	19.099	33.2535
6
Voltage	τ current (ms)	τ Fluorescence
-60	19.6121
-80	17.7776
-100	17.1796
-120	17.2284	44.1146
-140	17.6894	20.8886
-160	18.4246	12.1828
7
Voltage	τ current (ms)	τ Fluorescence
-60	34.1968
-80	22.9859
-100	20.1144
-120	19.2594	80.9499
-140	19.2773	54.929
-160	19.649	23.4189
8
Voltage	τ current (ms)	τ Fluorescence
-60	21.258
-80	19.3783
-100	18.7104
-120	18.663	109.692
-140	18.8078	60.3198
-160	18.8977	32.8822
n=7 because fluorescence trace for data number 3 couldn't be fitted reliably

## Sheet: Figure 5—figure supplement 2G
Figure 5—figure supplement 2G
K308R/A337Anap
τ Fluorescence at -160 mV
τ Fluorescence 30µM ATP	τ Fluorescence 300µM ATP
68.1028	18.5823
66.2949	27.5772
76.8397	40.4353
	33.2535
	12.1828
	23.4189
	32.8822
