# Supplementary material for: Voltage-clamp fluorometry analysis of structural rearrangements of ATP-gated channel P2X2 upon hyperpolarization
Source: eLife. 2021 May 19;10:e65822. doi: 10.7554/eLife.65822 (PMC8184218; doi:10.7554/eLife.65822)
Supplement: Figure 5—source data 1. [file elife-65822-fig5-data1.xlsx]

## Sheet: Figure 5C,D,E
Figure 5C,D,E
K308R/A337Anap			300µM ATP	n=8
1										Figure 5C	Fsteady-state
∆Ffast/Fo	% ∆Ffast/Fo	∆Fsteadystate/Fo	% ∆Fsteadystate/Fo	∆Fslow/Fo	% ∆Fslow/Fo	∆voltage				average ∆voltage	average % ∆Fsteady-state/F	SD	s.e.m
0.00551195	0.551195	0.00551803	0.551803	6.07583e-06	0.000607583	19.2261				18.9056	0.654385	0.164121	0.0580256
-0.000560946	-0.0560946	-0.000662507	-0.0662507	-0.000101561	-0.0101561	0				0	0.024223	0.0846827	0.0299398
-0.00614187	-0.614187	-0.00608963	-0.608963	5.22463e-05	0.00522463	-19.3481				-19.0773	-0.577749	0.196473	0.0694636
-0.0106416	-1.06416	-0.0106166	-1.06166	2.49576e-05	0.00249576	-38.5437				-38.1279	-1.13813	0.341655	0.120793
-0.0150496	-1.50496	-0.0147703	-1.47703	0.00027932	0.027932	-57.5867				-57.0221	-1.64304	0.468168	0.165522
-0.0190351	-1.90351	-0.0181592	-1.81592	0.000875987	0.0875987	-76.5991				-75.8743	-2.06617	0.598779	0.2117
-0.0220735	-2.20735	-0.0205944	-2.05944	0.00147909	0.147909	-95.3064				-94.4405	-2.46316	0.71446	0.2526
-0.0249702	-2.49702	-0.0230837	-2.30837	0.00188654	0.188654	-113.708				-112.846	-2.77458	0.777732	0.27497
-0.0279647	-2.79647	-0.0250324	-2.50324	0.00293222	0.293222	-131.622				-130.886	-3.0213	0.850425	0.300671
-0.0297122	-2.97122	-0.0262846	-2.62846	0.00342757	0.342757	-148.895				-148.59	-3.22945	0.927095	0.327777
-0.0319596	-3.19596	-0.0272796	-2.72796	0.00468002	0.468002	-165.161				-165.924	-3.40654	0.982759	0.347458
2										Figure 5D	Ffast
∆Ffast/Fo	% ∆Ffast/Fo	∆Fsteadystate/Fo	% ∆Fsteadystate/Fo	∆Fslow/Fo	% ∆Fslow/Fo	∆voltage				average ∆voltage	average % ∆Ffast/F	SD	s.e.m
0.00400876	0.400876	0.0040755	0.40755	6.67368e-05	0.00667368	19.3787				18.9056	0.636114	0.14479	0.051191
0.000514932	0.0514932	0.000402824	0.0402824	-0.000112108	-0.0112108	0				0	0.014293	0.0526231	0.0186051
-0.00344795	-0.344795	-0.00327374	-0.327374	0.000174202	0.0174202	-19.5007				-19.0773	-0.586389	0.139653	0.0493747
-0.00646472	-0.646472	-0.00646031	-0.646031	4.40609e-06	0.000440609	-38.9709				-38.1279	-1.16129	0.309783	0.109525
-0.00964634	-0.964634	-0.00930778	-0.930778	0.000338558	0.0338558	-58.2886				-57.0221	-1.67913	0.446841	0.157982
-0.0123184	-1.23184	-0.0114829	-1.14829	0.00083546	0.083546	-77.5757				-75.8743	-2.16459	0.580521	0.205245
-0.0149188	-1.49188	-0.0135426	-1.35426	0.00137618	0.137618	-96.5576				-94.4405	-2.64384	0.722278	0.255364
-0.0168763	-1.68763	-0.015383	-1.5383	0.00149326	0.149326	-115.509				-112.846	-2.98678	0.794318	0.280834
-0.0187808	-1.87808	-0.0165596	-1.65596	0.00222122	0.222122	-134.277				-130.886	-3.33036	0.875871	0.309667
-0.019832	-1.9832	-0.0175753	-1.75753	0.00225669	0.225669	-152.802				-148.59	-3.61279	0.974263	0.344454
-0.0213741	-2.13741	-0.0182923	-1.82923	0.00308177	0.308177	-170.99				-165.924	-3.90302	1.05237	0.372069
3										Figure 5E	Fslow
∆Ffast/Fo	% ∆Ffast/Fo	∆Fsteadystate/Fo	% ∆Fsteadystate/Fo	∆Fslow/Fo	% ∆Fslow/Fo	∆voltage				average ∆voltage	average % ∆Fslow/F	Norm % ∆Fslow/F	SD	s.e.m
0.00730938	0.730938	0.00753363	0.753363	0.000224255	0.0224255	19.6838				18.9056	0.0182709	0.0368008	0.0509802	0.0180242
8.5243e-05	0.0085243	0.000980198	0.0980198	0.000894955	0.0894955	0				0	0.00993002	0.0200009	0.0582253	0.0205858
-0.00679268	-0.679268	-0.00612323	-0.612323	0.00066945	0.066945	-19.6838				-19.0773	0.00864013	0.0174028	0.0814553	0.0287988
-0.0144274	-1.44274	-0.0132811	-1.32811	0.00114632	0.114632	-39.3066				-38.1279	0.0231532	0.0466348	0.100658	0.035588
-0.0201757	-2.01757	-0.019977	-1.9977	0.000198696	0.0198696	-58.9294				-57.0221	0.0360912	0.0726943	0.0615791	0.0217715
-0.0265829	-2.65829	-0.0256625	-2.56625	0.000920322	0.0920322	-78.5522				-75.8743	0.0984159	0.198227	0.0616579	0.0217994
-0.0328503	-3.28503	-0.0321408	-3.21408	0.000709511	0.0709511	-98.114				-94.4405	0.180683	0.363928	0.07661	0.0270857
-0.0373157	-3.73157	-0.0357817	-3.57817	0.00153401	0.153401	-117.676				-112.846	0.212204	0.427417	0.0975276	0.0344812
-0.0423161	-4.23161	-0.0392477	-3.92477	0.00306832	0.306832	-137.054				-130.886	0.309064	0.62251	0.0544776	0.0192607
-0.0457443	-4.57443	-0.042554	-4.2554	0.00319034	0.319034	-156.342				-148.59	0.38334	0.772116	0.0868839	0.0307181
-0.0502487	-5.02487	-0.0456047	-4.56047	0.00464396	0.464396	-175.537				-165.924	0.49648	1	0.108147	0.0382358
4										Figure 5E G-V
∆Ffast/Fo	% ∆Ffast/Fo	∆Fsteadystate/Fo	% ∆Fsteadystate/Fo	∆Fslow/Fo	% ∆Fslow/Fo	∆voltage				Voltage	Average Norm G/Gmax	s.e.m
0.00635807	0.635807	0.00632744	0.632744	-3.06283e-05	-0.00306283	19.043				-160	1	0
-0.000119494	-0.0119494	-0.000948035	-0.0948035	-0.00082854	-0.082854	0				-140	0.821193	0.0157269
-0.0064658	-0.64658	-0.00722977	-0.722977	-0.000763972	-0.0763972	-18.6768				-120	0.642077	0.026507
-0.0117474	-1.17474	-0.0132604	-1.32604	-0.00151302	-0.151302	-37.4451				-100	0.477358	0.0305529
-0.0179306	-1.79306	-0.0188099	-1.88099	-0.000879323	-0.0879323	-55.9387				-80	0.337915	0.0289913
-0.02306	-2.306	-0.0232029	-2.32029	-0.000142898	-0.0142898	-74.4019				-60	0.228212	0.0243473
-0.0286422	-2.86422	-0.0276752	-2.76752	0.000967022	0.0967022	-92.3462				-40	0.146294	0.0184854
-0.0316742	-3.16742	-0.0312519	-3.12519	0.000422373	0.0422373	-109.741				-20	0.0878218	0.0126538
-0.0363584	-3.63584	-0.0335456	-3.35456	0.00281283	0.281283	-126.251				0	0.0469429	0.00748496
-0.0393502	-3.93502	-0.0356286	-3.56286	0.00372165	0.372165	-141.785				20	0.0189805	0.00326732
-0.0418148	-4.18148	-0.0371963	-3.71963	0.00461846	0.461846	-156.677				40	0	0
5
∆Ffast/Fo	% ∆Ffast/Fo	∆Fsteadystate/Fo	% ∆Fsteadystate/Fo	∆Fslow/Fo	% ∆Fslow/Fo	∆voltage
0.0077333	0.77333	0.00760514	0.760514	-0.000128166	-0.0128166	18.4631
-5.58569e-05	-0.00558569	-0.000492791	-0.0492791	-0.000436934	-0.0436934	0
-0.00690662	-0.690662	-0.00799208	-0.799208	-0.00108547	-0.108547	-18.7683
-0.0149373	-1.49373	-0.0152031	-1.52031	-0.000265855	-0.0265855	-37.323
-0.0210692	-2.10692	-0.0206715	-2.06715	0.000397786	0.0397786	-55.8167
-0.0271837	-2.71837	-0.0262223	-2.62223	0.00096135	0.096135	-74.2493
-0.0332574	-3.32574	-0.0306121	-3.06121	0.00264533	0.264533	-92.4072
-0.0366066	-3.66066	-0.034078	-3.4078	0.00252864	0.252864	-110.504
-0.0399393	-3.99393	-0.0369546	-3.69546	0.00298476	0.298476	-128.296
-0.0442931	-4.42931	-0.0395441	-3.95441	0.00474896	0.474896	-145.844
-0.0473397	-4.73397	-0.0415785	-4.15785	0.00576127	0.576127	-163.208
6
∆Ffast/Fo	% ∆Ffast/Fo	∆Fsteadystate/Fo	% ∆Fsteadystate/Fo	∆Fslow/Fo	% ∆Fslow/Fo	∆voltage
0.00781128	0.781128	0.00917941	0.917941	0.00136812	0.136812	18.4937
0.000376641	0.0376641	0.000770706	0.0770706	0.000394065	0.0394065	0
-0.00705331	-0.705331	-0.00741417	-0.741417	-0.00036086	-0.036086	-19.0125
-0.01489	-1.489	-0.0147933	-1.47933	9.67477e-05	0.00967477	-37.9333
-0.0220681	-2.20681	-0.021505	-2.1505	0.000563143	0.0563143	-56.7017
-0.0280615	-2.80615	-0.0272335	-2.72335	0.000827953	0.0827953	-75.3784
-0.0341846	-3.41846	-0.0316244	-3.16244	0.00256018	0.256018	-93.7805
-0.0387874	-3.87874	-0.035479	-3.5479	0.0033085	0.33085	-112.03
-0.0428704	-4.28704	-0.0388195	-3.88195	0.00405091	0.405091	-129.974
-0.0461842	-4.61842	-0.0417392	-4.17392	0.00444498	0.444498	-147.98
-0.0504793	-5.04793	-0.043686	-4.3686	0.00679331	0.679331	-165.649
7
∆Ffast/Fo	% ∆Ffast/Fo	∆Fsteadystate/Fo	% ∆Fsteadystate/Fo	∆Fslow/Fo	% ∆Fslow/Fo	∆voltage
0.00477914	0.477914	0.00502271	0.502271	0.000243565	0.0243565	18.8599
0.0011399	0.11399	0.00139672	0.139672	0.000256821	0.0256821	0
-0.00389151	-0.389151	-0.00248896	-0.248896	0.00140256	0.140256	-19.043
-0.00846347	-0.846347	-0.00655763	-0.655763	0.00190584	0.190584	-38.2385
-0.0116159	-1.16159	-0.0102768	-1.02768	0.00133914	0.133914	-57.2205
-0.0150262	-1.50262	-0.0132783	-1.32783	0.00174794	0.174794	-76.1719
-0.0186469	-1.86469	-0.0164033	-1.64033	0.0022436	0.22436	-94.9097
-0.0218549	-2.18549	-0.0192572	-1.92572	0.00259772	0.259772	-113.617
-0.0248494	-2.48494	-0.0212275	-2.12275	0.00362181	0.362181	-132.05
-0.0268444	-2.68444	-0.0227684	-2.27684	0.00407596	0.407596	-150.238
-0.0300997	-3.00997	-0.0246192	-2.46192	0.00548052	0.548052	-168.213
8
∆Ffast/Fo	% ∆Ffast/Fo	∆Fsteadystate/Fo	% ∆Fsteadystate/Fo	∆Fslow/Fo	% ∆Fslow/Fo	∆voltage
0.00737723	0.737723	0.00708893	0.708893	-0.000288295	-0.0288295	18.0969
-0.000236978	-0.0236978	0.000490726	0.0490726	0.000727704	0.0727704	0
-0.0062114	-0.62114	-0.00560835	-0.560835	0.000603057	0.0603057	-18.5852
-0.0113311	-1.13311	-0.0108782	-1.08782	0.000452869	0.0452869	-37.262
-0.0167746	-1.67746	-0.0161246	-1.61246	0.000649981	0.0649981	-55.6946
-0.021899	-2.1899	-0.0200519	-2.00519	0.00184716	0.184716	-74.0662
-0.0269339	-2.69339	-0.0244602	-2.44602	0.0024737	0.24737	-92.1021
-0.030857	-3.0857	-0.0276518	-2.76518	0.00320528	0.320528	-109.985
-0.0333498	-3.33498	-0.0303168	-3.03168	0.00303302	0.303302	-127.563
-0.0370624	-3.70624	-0.0322613	-3.22613	0.00480104	0.480104	-144.836
-0.0389254	-3.89254	-0.0342664	-3.42664	0.00465908	0.465908	-161.957

## Sheet: Figure 5H,I,J
Figure 5H,I,J
K308R/A337Anap			300µM ATP	n=5
1										Figure 5H	Fsteady-state
∆Ffast/Fo	% ∆Ffast/Fo	∆Fsteadystate/Fo	% ∆Fsteadystate/Fo	∆Fslow/Fo	% ∆Fslow/Fo	∆voltage				average ∆voltage	average % ∆Fsteady-state/F	SD	s.e.m
0.0226917	2.26917	0.02253	2.253	-0.000161652	-0.0161652	57.312				55.0598	2.26973	0.334696	0.149681
0.0157703	1.57703	0.015329	1.5329	-0.000441293	-0.0441293	38.9404				37.8662	1.61958	0.385951	0.172603
0.00766627	0.766627	0.00785359	0.785359	0.000187324	0.0187324	19.5312				19.0552	0.802472	0.230471	0.10307
-0.000178371	-0.0178371	-0.000244258	-0.0244258	-6.58873e-05	-0.00658873	0				0	0.0127094	0.0940421	0.0420569
-0.00812904	-0.812904	-0.00767506	-0.767506	0.000453975	0.0453975	-19.4092				-19.0369	-0.762497	0.166299	0.0743712
-0.0157095	-1.57095	-0.0149553	-1.49553	0.0007542	0.07542	-38.8489				-38.0554	-1.48861	0.352921	0.157831
-0.0219581	-2.19581	-0.0214398	-2.14398	0.000518292	0.0518292	-58.2275				-56.9397	-2.13607	0.544955	0.243711
-0.0263809	-2.63809	-0.0267186	-2.67186	-0.000337712	-0.0337712	-77.4841				-75.6165	-2.65647	0.706265	0.315851
-0.0347457	-3.47457	-0.0319995	-3.19995	0.00274617	0.274617	-96.344				-93.9026	-3.13856	0.853535	0.381712
-0.0392664	-3.92664	-0.0366638	-3.66638	0.00260259	0.260259	-115.082				-111.92	-3.49326	0.942989	0.421718
-0.0433233	-4.33233	-0.0399786	-3.99786	0.0033447	0.33447	-133.606				-129.529	-3.77667	1.00224	0.448213
-0.0468035	-4.68035	-0.0425731	-4.25731	0.00423039	0.423039	-151.886				-146.619	-3.96656	1.05356	0.471165
-0.0506112	-5.06112	-0.0447898	-4.47898	0.00582137	0.582137	-169.678				-162.805	-4.13213	1.05184	0.470398
2										Figure 5I	Ffast
∆Ffast/Fo	% ∆Ffast/Fo	∆Fsteadystate/Fo	% ∆Fsteadystate/Fo	∆Fslow/Fo	% ∆Fslow/Fo	∆voltage				average ∆voltage	average % ∆Ffast/F	SD	s.e.m
0.026668	2.6668	0.0271045	2.71045	0.000436549	0.0436549	51.5747				55.0598	2.26321	0.325359	0.145505
0.0211224	2.11224	0.0222556	2.22556	0.00113326	0.113326	36.377				37.8662	1.59244	0.349132	0.156137
0.0118516	1.18516	0.0117353	1.17353	-0.00011633	-0.011633	18.5242				19.0552	0.831383	0.226113	0.101121
0.000100031	0.0100031	0.00153814	0.153814	0.00143811	0.143811	0				0	-0.00331993	0.0711747	0.0318303
-0.0104106	-1.04106	-0.00948455	-0.948455	0.000926077	0.0926077	-18.6462				-19.0369	-0.765643	0.194287	0.0868878
-0.0203803	-2.03803	-0.0190947	-1.90947	0.00128567	0.128567	-37.4146				-38.0554	-1.52369	0.35748	0.15987
-0.0305993	-3.05993	-0.0286332	-2.86332	0.00196614	0.196614	-55.9692				-56.9397	-2.18155	0.592782	0.2651
-0.038791	-3.8791	-0.036111	-3.6111	0.00268003	0.268003	-74.2798				-75.6165	-2.7799	0.760867	0.34027
-0.0459841	-4.59841	-0.0426487	-4.26487	0.00333545	0.333545	-92.1631				-93.9026	-3.35709	0.91764	0.410381
-0.0526817	-5.26817	-0.047114	-4.7114	0.00556771	0.556771	-109.833				-111.92	-3.82975	1.04311	0.466492
-0.058225	-5.8225	-0.0507628	-5.07628	0.00746214	0.746214	-126.953				-129.529	-4.19813	1.16716	0.521968
-0.0614962	-6.14962	-0.0530829	-5.30829	0.00841331	0.841331	-143.555				-146.619	-4.52652	1.20348	0.538211
-0.0636077	-6.36077	-0.0544631	-5.44631	0.00914463	0.914463	-159.119				-162.805	-4.75995	1.23639	0.552931
3										Figure 5J	Fslow
∆Ffast/Fo	% ∆Ffast/Fo	∆Fsteadystate/Fo	% ∆Fsteadystate/Fo	∆Fslow/Fo	% ∆Fslow/Fo	∆voltage				average ∆voltage	average % ∆Fslow/F	SD	s.e.m	Norm F slow
0.0238285	2.38285	0.0241365	2.41365	0.000308014	0.0308014	50.0183				55.0598	0.00652021	0.0407165	0.018209	0.0103856
0.0167128	1.67128	0.0171946	1.71946	0.000481897	0.0481897	36.0718				37.8662	0.0271435	0.0661975	0.0296044	0.0432349
0.00876691	0.876691	0.00827846	0.827846	-0.000488449	-0.0488449	18.3411				19.0552	-0.0289111	0.0539462	0.0241255	-0.0460505
-0.0010485	-0.10485	-0.000107832	-0.0107832	0.000940667	0.0940667	0				0	0.0160293	0.101248	0.0452793	0.025532
-0.00760699	-0.760699	-0.00838356	-0.838356	-0.00077657	-0.077657	-18.4021				-19.0369	0.00314681	0.0688242	0.0307791	0.00501233
-0.0158565	-1.58565	-0.0165078	-1.65078	-0.000651289	-0.0651289	-36.7432				-38.0554	0.0350798	0.0982032	0.0439178	0.0558761
-0.0230395	-2.30395	-0.0233075	-2.33075	-0.000268016	-0.0268016	-54.8706				-56.9397	0.045474	0.105356	0.0471166	0.0724324
-0.0313088	-3.13088	-0.0293721	-2.93721	0.00193666	0.193666	-72.6013				-75.6165	0.123424	0.134764	0.0602683	0.196594
-0.0367659	-3.67659	-0.034799	-3.4799	0.00196687	0.196687	-89.7217				-93.9026	0.218524	0.0868051	0.0388204	0.348072
-0.0421302	-4.21302	-0.0384599	-3.84599	0.00367028	0.367028	-106.354				-111.92	0.336488	0.141105	0.0631041	0.535969
-0.0454783	-4.54783	-0.0408379	-4.08379	0.00464038	0.464038	-122.162				-129.529	0.421457	0.197799	0.0884585	0.671309
-0.04972	-4.972	-0.0427738	-4.27738	0.00694627	0.694627	-136.993				-146.619	0.559954	0.200094	0.089485	0.891912
-0.0518698	-5.18698	-0.0440745	-4.40745	0.00779533	0.779533	-149.384				-162.805	0.627813	0.215598	0.0964184	1
4										Figure 5J G-V
∆Ffast/Fo	% ∆Ffast/Fo	∆Fsteadystate/Fo	% ∆Fsteadystate/Fo	∆Fslow/Fo	% ∆Fslow/Fo	∆voltage				Voltage	Average Norm G/Gmax	s.e.m
0.0222901	2.22901	0.0217495	2.17495	-0.000540647	-0.0540647	58.2275				-160	1	0
0.0144375	1.44375	0.0140858	1.40858	-0.00035173	-0.035173	39.032				-140	0.836569	0.0139973
0.00756991	0.756991	0.00643686	0.643686	-0.00113304	-0.113304	19.4702				-120	0.664113	0.0208179
1.72462e-05	0.00172462	-0.000992786	-0.0992786	-0.00101003	-0.101003	0				-100	0.499773	0.0214077
-0.00712601	-0.712601	-0.00760731	-0.760731	-0.000481298	-0.0481298	-19.4397				-80	0.356638	0.0193109
-0.0136381	-1.36381	-0.0143935	-1.43935	-0.000755418	-0.0755418	-38.7573				-60	0.243164	0.0175808
-0.0190167	-1.90167	-0.0197837	-1.97837	-0.000767	-0.0767	-57.9834				-40	0.158947	0.014867
-0.0235831	-2.35831	-0.0236479	-2.36479	-6.47679e-05	-0.00647679	-76.9653				-20	0.100335	0.0116682
-0.0290725	-2.90725	-0.0279612	-2.79612	0.00111131	0.111131	-95.6116				0	0.0609544	0.00829862
-0.0324893	-3.24893	-0.0306732	-3.06732	0.00181616	0.181616	-113.983				20	0.0350099	0.00537548
-0.0361717	-3.61717	-0.0337019	-3.37019	0.00246981	0.246981	-131.897				40	0.0178899	0.00302052
-0.0389864	-3.89864	-0.0352893	-3.52893	0.00369703	0.369703	-149.17				60	0.0070037	0.00126174
-0.0412776	-4.12776	-0.0372415	-3.72415	0.00403604	0.403604	-166.016				80	0	0
5
∆Ffast/Fo	% ∆Ffast/Fo	∆Fsteadystate/Fo	% ∆Fsteadystate/Fo	∆Fslow/Fo	% ∆Fslow/Fo	∆voltage
0.017682	1.7682	0.0179658	1.79658	0.000283747	0.0283747	58.1665
0.011579	1.1579	0.012114	1.2114	0.000535036	0.0535036	38.9099
0.00571445	0.571445	0.00581939	0.581939	0.000104941	0.0104941	19.4092
0.000943596	0.0943596	0.000442207	0.0442207	-0.000501389	-0.0501389	0
-0.0050095	-0.50095	-0.00497434	-0.497434	3.51565e-05	0.00351565	-19.2871
-0.0106003	-1.06003	-0.00947943	-0.947943	0.00112083	0.112083	-38.5132
-0.0144637	-1.44637	-0.0136394	-1.36394	0.000824286	0.0824286	-57.6477
-0.0189311	-1.89311	-0.0169741	-1.69741	0.00195698	0.195698	-76.7517
-0.0212862	-2.12862	-0.0195198	-1.95198	0.0017664	0.17664	-95.6726
-0.0249199	-2.49199	-0.0217522	-2.17522	0.00316766	0.316766	-114.349
-0.0267083	-2.67083	-0.0235525	-2.35525	0.00315582	0.315582	-133.026
-0.0293196	-2.93196	-0.0246089	-2.46089	0.00471071	0.471071	-151.489
-0.0306311	-3.06311	-0.0260378	-2.60378	0.00459328	0.459328	-169.83
