# Supplementary material for: Voltage-clamp fluorometry analysis of structural rearrangements of ATP-gated channel P2X2 upon hyperpolarization
Source: eLife. 2021 May 19;10:e65822. doi: 10.7554/eLife.65822 (PMC8184218; doi:10.7554/eLife.65822)
Supplement: Figure 6—figure supplement 1—source data 1. [file elife-65822-fig6-figsupp1-data1.xlsx]

## Sheet: Figure 6—figure supplement 1
Figure 6—figure supplement 1
K308R/A337Anap			0 ATP 5x		n=5								K308R/A337Anap			300µM ATP 5x		n=5
1					Fsteady-state 0 ATP								1					Fsteady-state 300µM ATP
∆F/Fo	% ∆F/Fo	∆voltage			average ∆voltage	average % ∆F/F	SD	s.e.m					∆F/Fo	% ∆F/Fo	∆voltage			average ∆voltage	average % ∆F/F	SD	s.e.m
0.00272095	0.272095	19.8669			19.1772	0.48264	0.368378	0.164744					0.00232118	0.232118	18.8293			16.9312	0.273953	0.260714	0.116595
-0.00196779	-0.196779	0			0	-0.0820029	0.0776442	0.0347235					-0.00144792	-0.144792	0			0	-0.101858	0.0452568	0.0202395
-0.00558162	-0.558162	-19.8059			-19.3848	-0.656268	0.340186	0.152136					-0.0043236	-0.43236	-19.2566			-17.3157	-0.479241	0.284935	0.127427
-0.0100989	-1.00989	-39.5508			-38.9099	-1.21627	0.67541	0.302052					-0.00699735	-0.699735	-38.3301			-35.5591	-0.777052	0.473605	0.211803
-0.014828	-1.4828	-59.3262			-58.5754	-1.77386	1.01393	0.453444					-0.0101604	-1.01604	-57.5256			-53.6011	-1.06917	0.581652	0.260123
-0.0184572	-1.84572	-79.071			-78.0457	-2.24086	1.28819	0.576098					-0.01161	-1.161	-76.3245			-72.0886	-1.31312	0.791215	0.353842
-0.0221252	-2.21252	-98.938			-97.5708	-2.71803	1.57596	0.704791					-0.0135038	-1.35038	-94.9097			-89.9231	-1.55211	0.912385	0.408031
-0.026225	-2.6225	-118.591			-116.901	-3.16807	1.78346	0.797589					-0.0154173	-1.54173	-112.915			-107.178	-1.70805	1.0103	0.451819
-0.0293808	-2.93808	-138.275			-136.017	-3.55727	1.99476	0.892083					-0.0163567	-1.63567	-130.646			-123.81	-1.8409	1.06922	0.478169
-0.0321615	-3.21615	-157.867			-154.926	-3.93113	2.12791	0.95163					-0.0170516	-1.70516	-147.675			-139.789	-1.96972	1.12956	0.505155
-0.0349461	-3.49461	-177.216			-173.376	-4.20913	2.22932	0.996982					-0.0181427	-1.81427	-164.001			-155.121	-2.0873	1.1949	0.534377
2													2
∆F/Fo	% ∆F/Fo	∆voltage											∆F/Fo	% ∆F/Fo	∆voltage
0.00446952	0.446952	18.6462											0.000905156	0.0905156	14.9841
-0.00112248	-0.112248	0											-0.00124425	-0.124425	0
-0.00751955	-0.751955	-18.7988											-0.0041964	-0.41964	-15.1978
-0.0127204	-1.27204	-38.208											-0.00645947	-0.645947	-32.3486
-0.0187747	-1.87747	-58.075											-0.00835734	-0.835734	-49.7131
-0.0244314	-2.44314	-77.7893											-0.0101271	-1.01271	-68.2983
-0.029288	-2.9288	-97.5647											-0.012469	-1.2469	-85.2661
-0.0340787	-3.40787	-117.249											-0.0129135	-1.29135	-102.142
-0.0391113	-3.91113	-136.749											-0.0134731	-1.34731	-118.225
-0.0426524	-4.26524	-156.311											-0.0139514	-1.39514	-133.911
-0.0462389	-4.62389	-175.507											-0.0154783	-1.54783	-148.956
3													3
∆F/Fo	% ∆F/Fo	∆voltage											∆F/Fo	% ∆F/Fo	∆voltage
0.00486767	0.486767	19.043											0.00215447	0.215447	15.686
-0.000702739	-0.0702739	0											-0.000622213	-0.0622213	0
-0.00549704	-0.549704	-19.4397											-0.00409377	-0.409377	-15.9912
-0.0112327	-1.12327	-38.8489											-0.00694108	-0.694108	-33.9966
-0.0148847	-1.48847	-58.5022											-0.00949353	-0.949353	-50.5981
-0.0186708	-1.86708	-77.7283											-0.012345	-1.2345	-69.3665
-0.0239241	-2.39241	-97.0764											-0.0137712	-1.37712	-87.1582
-0.0278792	-2.78792	-116.211											-0.015162	-1.5162	-103.729
-0.0315673	-3.15673	-134.888											-0.0166778	-1.66778	-119.202
-0.0356124	-3.56124	-153.29											-0.0184767	-1.84767	-133.667
-0.0383243	-3.83243	-171.021											-0.0182577	-1.82577	-146.973
4													4
∆F/Fo	% ∆F/Fo	∆voltage											∆F/Fo	% ∆F/Fo	∆voltage
0.0012002	0.12002	19.1956											0.00105357	0.105357	17.4255
-0.000377774	-0.0377774	0											-0.000445725	-0.0445725	0
-0.0024879	-0.24879	-19.4397											-0.00181038	-0.181038	-17.7307
-0.00405151	-0.405151	-38.9099											-0.00280584	-0.280584	-36.499
-0.00627607	-0.627607	-58.3801											-0.00498087	-0.498087	-55.2673
-0.00771964	-0.771964	-77.7283											-0.00519587	-0.519587	-73.7305
-0.00867641	-0.867641	-96.9849											-0.00682129	-0.682129	-92.041
-0.0106274	-1.06274	-116.18											-0.00764229	-0.764229	-109.955
-0.0114926	-1.14926	-135.162											-0.00884565	-0.884565	-127.289
-0.0138499	-1.38499	-153.748											-0.00996604	-0.996604	-143.677
-0.0147929	-1.47929	-171.906											-0.0109126	-1.09126	-159.363
5													5
∆F/Fo	% ∆F/Fo	∆voltage											∆F/Fo	% ∆F/Fo	∆voltage
0.0108737	1.08737	19.1345											0.00726325	0.726325	17.7307
7.06315e-05	0.00706315	0											-0.00133282	-0.133282	0
-0.0117273	-1.17273	-19.4397											-0.00953788	-0.953788	-18.4021
-0.02271	-2.271	-39.032											-0.0156489	-1.56489	-36.6211
-0.0339295	-3.39295	-58.5938											-0.0204665	-2.04665	-54.9011
-0.0427638	-4.27638	-77.9114											-0.0263782	-2.63782	-72.7234
-0.0518879	-5.18879	-97.29											-0.0310403	-3.10403	-90.2405
-0.0595929	-5.95929	-116.272											-0.0342674	-3.42674	-107.147
-0.0663114	-6.63114	-135.01											-0.0366918	-3.66918	-123.688
-0.0722803	-7.22803	-153.412											-0.0390405	-3.90405	-140.015
-0.0761544	-7.61544	-171.234											-0.0415735	-4.15735	-156.311

## Sheet: Figure 6—figure supplement 1B
Figure 6—figure supplement 1B
K308R/A337Anap
F intensity at -160 mV (V)
0 ATP 5x	300µM ATP 5x
2.02871	1.77695
2.81848	2.50364
1.19604	1.12408
1.21441	1.13627
1.14522	1.05119
