# Supplementary material for: Voltage-clamp fluorometry analysis of structural rearrangements of ATP-gated channel P2X2 upon hyperpolarization
Source: eLife. 2021 May 19;10:e65822. doi: 10.7554/eLife.65822 (PMC8184218; doi:10.7554/eLife.65822)
Supplement: Figure 6—source data 1. [file elife-65822-fig6-data1.xlsx]

## Sheet: Figure 6C,D,E,F
Figure 6C												Figure 6D,E,F
K308R/A337Anap			0 ATP	n=6								K308R/A337Anap			300µM ATP	n=6
1						Figure 6C	∆F/Fo is calculated at steady-state					1										Figure 6D	Fsteady-state
∆F/Fo	% ∆F/Fo	∆voltage				average ∆voltage	average % ∆F/F	SD	s.e.m			∆Ffast/Fo	% ∆Ffast/Fo	∆Fsteadystate/Fo	% ∆Fsteadystate/Fo	∆Fslow/Fo	% ∆Fslow/Fo	∆voltage				average ∆voltage	average % ∆Fsteady-state/F	SD	s.e.m
0.00632876	0.632876	19.5007				19.8415	0.549249	0.179645	0.0733396			0.00258417	0.258417	0.00244908	0.244908	-0.000135092	-0.0135092	18.7683				18.987	0.265649	0.0807954	0.0329846
-0.000744343	-0.0744343	0				0	-0.0671517	0.0238656	0.00974308			-0.000570159	-0.0570159	-0.00036923	-0.036923	0.000200929	0.0200929	0				0	0.00392921	0.05444	0.022225
-0.00672108	-0.672108	-19.6228				-19.7601	-0.641184	0.158827	0.0648408			-0.00330692	-0.330692	-0.00358046	-0.358046	-0.000273542	-0.0273542	-18.7683				-18.9819	-0.275767	0.115748	0.0472538
-0.0141189	-1.41189	-39.1541				-39.444	-1.23091	0.377531	0.154126			-0.00647977	-0.647977	-0.00628054	-0.628054	0.000199229	0.0199229	-37.6587				-37.8265	-0.532961	0.17904	0.0730927
-0.019061	-1.9061	-58.9905				-59.255	-1.74106	0.524174	0.213993			-0.0081985	-0.81985	-0.00790048	-0.790048	0.000298022	0.0298022	-56.2439				-56.4168	-0.720496	0.23063	0.0941543
-0.0255104	-2.55104	-78.4302				-78.9693	-2.26577	0.663448	0.270851			-0.0101568	-1.01568	-0.0102196	-1.02196	-6.28307e-05	-0.00628307	-74.9512				-74.9156	-0.88308	0.271234	0.110731
-0.0307364	-3.07364	-98.2361				-98.6938	-2.76521	0.819757	0.334664			-0.0112176	-1.12176	-0.0113453	-1.13453	-0.00012766	-0.012766	-93.4448				-93.0888	-1.02239	0.309033	0.126162
-0.0372608	-3.72608	-117.828				-118.383	-3.23057	0.998506	0.407638			-0.0145769	-1.45769	-0.0130571	-1.30571	0.00151978	0.151978	-112				-111.079	-1.1667	0.361925	0.147755
-0.0416038	-4.16038	-137.512				-138.016	-3.65598	1.10525	0.451216			-0.0145404	-1.45404	-0.0137926	-1.37926	0.000747835	0.0747835	-130.28				-128.799	-1.25562	0.382248	0.156052
-0.0462196	-4.62196	-156.982				-157.659	-4.03691	1.21566	0.49629			-0.0160779	-1.60779	-0.014416	-1.4416	0.00166197	0.166197	-148.438				-146.342	-1.35158	0.401862	0.16406
-0.0501993	-5.01993	-176.514				-177.2	-4.3995	1.33969	0.546925			-0.0171648	-1.71648	-0.0155198	-1.55198	0.00164498	0.164498	-166.382				-163.732	-1.41756	0.412797	0.168524
2												2										Figure 6E	Ffast
∆F/Fo	% ∆F/Fo	∆voltage										∆Ffast/Fo	% ∆Ffast/Fo	∆Fsteadystate/Fo	% ∆Fsteadystate/Fo	∆Fslow/Fo	% ∆Fslow/Fo	∆voltage				average ∆voltage	average % ∆Ffast/F	SD	s.e.m
0.00531183	0.531183	19.7754										0.00223279	0.223279	0.00265682	0.265682	0.000424029	0.0424029	19.2871				18.987	0.191337	0.168692	0.0688682
-0.000748353	-0.0748353	0										-0.000137975	-0.0137975	0.000758606	0.0758606	0.00089658	0.089658	0				0	-0.0813198	0.202175	0.0825378
-0.00621529	-0.621529	-19.8059										-0.00121941	-0.121941	-0.00097754	-0.097754	0.000241872	0.0241872	-19.2871				-18.9819	-0.347677	0.276496	0.112879
-0.0122346	-1.22346	-39.5813										-0.00350374	-0.350374	-0.00275763	-0.275763	0.000746109	0.0746109	-38.4521				-37.8265	-0.617446	0.357165	0.145812
-0.0176197	-1.76197	-59.2651										-0.00513071	-0.513071	-0.0038854	-0.38854	0.00124531	0.124531	-57.373				-56.4168	-0.831535	0.403136	0.16458
-0.0224873	-2.24873	-79.01										-0.0069922	-0.69922	-0.00506862	-0.506862	0.00192359	0.192359	-76.2024				-74.9156	-1.0311	0.487719	0.199111
-0.0272791	-2.72791	-98.6023										-0.00718836	-0.718836	-0.00588108	-0.588108	0.00130728	0.130728	-94.9097				-93.0888	-1.16722	0.507067	0.207009
-0.0320538	-3.20538	-118.347										-0.00824754	-0.824754	-0.00676298	-0.676298	0.00148456	0.148456	-113.525				-111.079	-1.36691	0.579224	0.236467
-0.0359225	-3.59225	-137.878										-0.00951082	-0.951082	-0.00714743	-0.714743	0.00236339	0.236339	-131.958				-128.799	-1.5069	0.600987	0.245352
-0.0395422	-3.95422	-157.532										-0.0100557	-1.00557	-0.00793037	-0.793037	0.00212536	0.212536	-150.238				-146.342	-1.60333	0.636352	0.25979
-0.043225	-4.3225	-176.971										-0.0109687	-1.09687	-0.00852038	-0.852038	0.00244836	0.244836	-168.427				-163.732	-1.7438	0.67393	0.275131
3												3										Figure 6F	Fslow
∆F/Fo	% ∆F/Fo	∆voltage										∆Ffast/Fo	% ∆Ffast/Fo	∆Fsteadystate/Fo	% ∆Fsteadystate/Fo	∆Fslow/Fo	% ∆Fslow/Fo	∆voltage				average ∆voltage	average % ∆Fslow/F	SD	s.e.m
0.00328786	0.328786	19.8975										0.00386272	-0.135174	0.00420155	0.420155	0.000338835	0.0338835	18.9209				18.987	-0.00548836	0.0621793	0.0253846
-0.000897337	-0.0897337	0										0.000379188	-0.483174	0.000394807	0.0394807	1.56187e-05	0.00156187	0				0	0.0055133	0.0473357	0.0193247
-0.0042861	-0.42861	-19.928										-0.00372458	-0.893688	-0.00368812	-0.368812	3.64585e-05	0.00364585	-19.1345				-18.9819	-0.00788576	0.0440158	0.0179694
-0.00740295	-0.740295	-39.7644										-0.00777588	-1.29906	-0.00738871	-0.738871	0.000387166	0.0387166	-38.0859				-37.8265	0.00466473	0.0564932	0.0230633
-0.0110194	-1.10194	-59.2651										-0.0108236	-1.60393	-0.0100741	-1.00741	0.000749455	0.0749455	-56.8542				-56.4168	0.0313867	0.0590326	0.0241
-0.0146769	-1.46769	-79.4678										-0.0146225	-1.98397	-0.0122231	-1.22231	0.00239939	0.239939	-75.47				-74.9156	0.0681859	0.119064	0.0486077
-0.0186032	-1.86032	-99.2737										-0.0160245	-2.12377	-0.0141451	-1.41451	0.00187932	0.187932	-93.8416				-93.0888	0.0652373	0.0788785	0.032202
-0.0203594	-2.03594	-118.774										-0.0189439	-2.41564	-0.0163083	-1.63083	0.00263559	0.263559	-112				-111.079	0.120605	0.084878	0.0346513
-0.0244794	-2.44794	-138.367										-0.0212109	-2.64287	-0.0175541	-1.75541	0.00365673	0.365673	-129.974				-128.799	0.171659	0.114157	0.0466044
-0.0257112	-2.57112	-158.539										-0.0226141	-2.78268	-0.0188618	-1.88618	0.00375227	0.375227	-147.675				-146.342	0.172164	0.111744	0.0456193
-0.0285949	-2.85949	-178.162										-0.0247297	-2.99404	-0.0194963	-1.94963	0.00523343	0.523343	-165.161				-163.732	0.246446	0.140579	0.057391
4												4
∆F/Fo	% ∆F/Fo	∆voltage										∆Ffast/Fo	% ∆Ffast/Fo	∆Fsteadystate/Fo	% ∆Fsteadystate/Fo	∆Fslow/Fo	% ∆Fslow/Fo	∆voltage
0.00795646	0.795646	19.8364										0.00324376	0.359757	0.00231969	0.231969	-0.000924075	-0.0924075	19.3481
-0.000882853	-0.0882853	0										-0.00021492	0.0141479	-0.000712689	-0.0712689	-0.000497769	-0.0497769	0
-0.00846248	-0.846248	-19.7144										-0.00307416	-0.271799	-0.00384699	-0.384699	-0.000772832	-0.0772832	-19.2871
-0.0172493	-1.72493	-39.4287										-0.00614616	-0.579256	-0.00683029	-0.683029	-0.000684124	-0.0684124	-38.3911
-0.0245132	-2.45132	-59.2651										-0.00891032	-0.855137	-0.00920533	-0.920533	-0.000295002	-0.0295002	-57.312
-0.0312758	-3.12758	-79.1626										-0.0103777	-1.00229	-0.0108651	-1.08651	-0.000487425	-0.0487425	-76.0803
-0.0388149	-3.88149	-98.6328										-0.0127496	-1.23911	-0.0127475	-1.27475	2.102e-06	0.0002102	-94.6045
-0.0451698	-4.51698	-118.713										-0.0150431	-1.46847	-0.0146083	-1.46083	0.000434828	0.0434828	-112.823
-0.0516524	-5.16524	-138.458										-0.016224	-1.58657	-0.0156165	-1.56165	0.000607497	0.0607497	-130.554
-0.056754	-5.6754	-157.99										-0.0176066	-1.7248	-0.0168941	-1.68941	0.000712525	0.0712525	-147.98
-0.0624819	-6.24819	-177.673										-0.0192955	-1.89392	-0.0177024	-1.77024	0.0015931	0.15931	-165.161
5												5
∆F/Fo	% ∆F/Fo	∆voltage										∆Ffast/Fo	% ∆Ffast/Fo	∆Fsteadystate/Fo	% ∆Fsteadystate/Fo	∆Fslow/Fo	% ∆Fslow/Fo	∆voltage
0.00361128	0.361128	20.3247										0.00246747	0.225642	0.00182492	0.182492	-0.000642553	-0.0642553	19.104
-0.000324536	-0.0324536	0										-5.54684e-05	-0.0269827	-0.000143725	-0.0143725	-8.82563e-05	-0.00882563	0
-0.00502299	-0.502299	-19.6533										-0.00237797	-0.259082	-0.00257007	-0.257007	-0.000192106	-0.0192106	-19.2261
-0.0084291	-0.84291	-39.1541										-0.00484189	-0.505492	-0.00462203	-0.462203	0.000219863	0.0219863	-38.269
-0.0116522	-1.16522	-59.4177										-0.00629663	-0.650477	-0.00649289	-0.649289	-0.000196255	-0.0196255	-57.0679
-0.0151482	-1.51482	-78.8574										-0.00765399	-0.786705	-0.00774797	-0.774797	-9.3976e-05	-0.0093976	-75.7751
-0.0178836	-1.78836	-98.9075										-0.0097746	-0.99839	-0.00920076	-0.920076	0.000573835	0.0573835	-94.1162
-0.020838	-2.0838	-118.652										-0.0109892	-1.11985	-0.0103545	-1.03545	0.00063466	0.063466	-112.396
-0.0232665	-2.32665	-138.184										-0.012643	-1.28479	-0.0110482	-1.10482	0.00159482	0.159482	-130.341
-0.0270466	-2.70466	-157.928										-0.0130416	-1.32522	-0.0120388	-1.20388	0.00100287	0.100287	-147.949
-0.0287104	-2.87104	-177.795										-0.0139417	-1.41548	-0.0123391	-1.23391	0.00160258	0.160258	-165.222
6												6
∆F/Fo	% ∆F/Fo	∆voltage										∆Ffast/Fo	% ∆Ffast/Fo	∆Fsteadystate/Fo	% ∆Fsteadystate/Fo	∆Fslow/Fo	% ∆Fslow/Fo	∆voltage
0.00645874	0.645874	19.7144										0.0018773	0.216102	0.00248686	0.248686	0.000609555	0.0609555	18.4937
-0.000431679	-0.0431679	0										0.000504288	0.0789031	0.000307984	0.0307984	-0.000196305	-0.0196305	0
-0.00776311	-0.776311	-19.8364										-0.00236983	-0.208861	-0.00188283	-0.188283	0.000487004	0.0487004	-18.1885
-0.0144195	-1.44195	-39.5813										-0.00351012	-0.322515	-0.00409847	-0.409847	-0.000588358	-0.0588358	-36.1023
-0.0205977	-2.05977	-59.3262										-0.00575324	-0.546746	-0.00567157	-0.567157	8.16742e-05	0.00816742	-53.6499
-0.0268476	-2.68476	-78.8879										-0.00727283	-0.698763	-0.00686043	-0.686043	0.000412403	0.0412403	-71.0144
-0.0325953	-3.25953	-98.5107										-0.00830291	-0.801432	-0.00802355	-0.802355	0.000279363	0.0279363	-87.616
-0.0381524	-3.81524	-117.981										-0.00943754	-0.915084	-0.00891068	-0.891068	0.000526866	0.0526866	-103.729
-0.0424339	-4.24339	-137.695										-0.0115075	-1.12207	-0.0101782	-1.01782	0.00132929	0.132929	-119.69
-0.046941	-4.6941	-156.982										-0.0120285	-1.17389	-0.0109537	-1.09537	0.00107481	0.107481	-135.773
-0.0507587	-5.07587	-176.086										-0.0137396	-1.34603	-0.0114753	-1.14753	0.0022643	0.22643	-152.039
