# Supplementary material for: Voltage-clamp fluorometry analysis of structural rearrangements of ATP-gated channel P2X2 upon hyperpolarization
Source: eLife. 2021 May 19;10:e65822. doi: 10.7554/eLife.65822 (PMC8184218; doi:10.7554/eLife.65822)
Supplement: Figure 7—source data 1. [file elife-65822-fig7-data1.xlsx]

## Sheet: Figure 7B
Figure 7B
G-V A337F		ATP 30µM	n=3		G-V A337Y		ATP 30µM	n=3		G-V A337E		ATP 30µM	n=3		G-V WT		ATP 30µM	n=3
Voltage	Average G/Gmax	s.e.m			Voltage	Average G/Gmax	s.e.m			Voltage	Average G/Gmax	s.e.m			Voltage	Average G/Gmax	s.e.m
-140	0.536669	0.156872			-140	0.482897	0.0526364			-140	0.734276	0.0508519			-140	0.819959	0.0173632
-120	0.488343	0.152778			-120	0.428568	0.0508519			-120	0.713823	0.0473165			-120	0.749304	0.0229694
-100	0.440145	0.147544			-100	0.370339	0.0473165			-100	0.688845	0.0423107			-100	0.666764	0.0297666
-80	0.39638	0.143069			-80	0.314848	0.0423107			-80	0.657783	0.0373293			-80	0.572464	0.0371055
-60	0.359452	0.139912			-60	0.268435	0.0373293			-60	0.622065	0.0331839			-60	0.481503	0.0437747
-40	0.329358	0.138212			-40	0.233849	0.0331839			-40	0.578408	0.0304811			-40	0.401811	0.0482203
-20	0.306761	0.137747			-20	0.209793	0.0304811			-20	0.529471	0.0287336			-20	0.335825	0.0490614
0	0.289987	0.138173			0	0.194269	0.0287336			0	0.475516	0.0277264			0	0.288619	0.0456816
20	0.278056	0.138979			20	0.184539	0.0277264			20	0.417298	0.0272385			20	0.25479	0.0386005
40	0.269632	0.139979			40	0.17863	0.0272385			40	0.359973	0.0272385			40	0.23287	0.0296369

## Sheet: Figure 7F
Figure 7F
G-V F44V		ATP 10µM	n=4		G-V WT	low expression level	ATP 10µM	n=3
Voltage	Average G/Gmax	s.e.m			Voltage	Average G/Gmax	s.e.m
-140	0.996919	0.000589317			-140	0.734639	0.019771
-120	0.990507	0.000960661			-120	0.641671	0.0331739
-100	0.980696	0.00129547			-100	0.543617	0.0428504
-80	0.973817	0.00257989			-80	0.454667	0.0473705
-60	0.970912	0.00377612			-60	0.380432	0.0476808
-40	0.969941	0.00430464			-40	0.323884	0.0447867
-20	0.969645	0.00449277			-20	0.28314	0.0420245
0	0.969557	0.00455367			0	0.254929	0.0415454
20	0.969532	0.00457241			20	0.236013	0.0426055
40	0.969524	0.00457812			40	0.22344	0.0443515

## Sheet: Figure 7I
Figure 7I
Current Amplitude (µA)
WT 30µM ATP		n=5
0 ATP	30µM ATP
-0.87	-9.12
-0.55	-9.93
-0.32	-10.6
-0.5	-10.4
-0.52	-12.37
F44E 30µM ATP		n=4
0 ATP	30µM ATP
-0.56	-7
-0.12	-6.84
-1	-9.89
-0.84	-8.87
F44E/A337R 30µM ATP		n=4
0 ATP	30µM ATP
-1.37	-1.42
-2.66	-2.69
-6.29	-6.35
-5.42	-5.65
