# Supplementary material for: Voltage-clamp fluorometry analysis of structural rearrangements of ATP-gated channel P2X2 upon hyperpolarization
Source: eLife journal article supplement (doi:10.7554/elife.65822), 2021-05-19

ANOVA OneWay (23/12/2020 15:20:02)

Input Data

|            | Data                        | Range   |
|------------|-----------------------------|---------|
| Control    | [Book1]Sheet1!A"Control"    | [1*:8*] |
| 30 nM SIK  | [Book1]Sheet1!B"30 nM SIK"  | [1*:6*] |
| 300 nM SIK | [Book1]Sheet1!C"300 nM SIK" | [1*:6*] |

Descriptive Statistics

|            | N Analysis | N Missing | Mean     | Standard Deviation | SE of Mean |
|------------|------------|-----------|----------|--------------------|------------|
| Control    | 8          | 0         | 3.1975   | 2.36339            | 0.83559    |
| 30 nM SIK  | 6          | 0         | 6.39833  | 4.6318             | 1.89092    |
| 300 nM SIK | 6          | 0         | 10.60167 | 6.04239            | 2.4668     |

One Way ANOVA

Overall ANOVA

|       | DF | Sum of Squares | Mean Square | F Value | Prob>F  |
|-------|----|----------------|-------------|---------|---------|
| Model | 2  | 187.96326      | 93.98163    | 4.85738 | 0.02145 |
| Error | 17 | 328.91992      | 19.34823    |         |         |
| Total | 19 | 516.88318      |             |         |         |

Null Hypothesis: The means of all levels are equal.

Alternative Hypothesis: The means of one or more levels are different.

At the 0.05 level, the population means are significantly different.

Fit Statistics

|  | R-Square | Coeff Var | Root MSE | Data Mean |
|--|----------|-----------|----------|-----------|
|  | 0.36365  | 0.68955   | 4.39866  | 6.379     |

Means Comparisons

Tukey Test

|                      | MeanDiff | SEM     | q Value | Prob    | Alpha | Sig | LCL      | UCL      |
|----------------------|----------|---------|---------|---------|-------|-----|----------|----------|
| 30 nM SIK Control    | 3.20083  | 2.37555 | 1.90552 | 0.38949 | 0.05  | 0   | -2.89326 | 9.29493  |
| 300 nM SIK Control   | 7.40417  | 2.37555 | 4.40785 | 0.01639 | 0.05  | 1   | 1.31007  | 13.49826 |
| 300 nM SIK 30 nM SIK | 4.20333  | 2.53957 | 2.34072 | 0.25072 | 0.05  | 0   | -2.31153 | 10.7182  |

Sig equals 1 indicates that the difference of the means is significant at the 0.05 level.

Sig equals 0 indicates that the difference of the means is not significant at the 0.05 level.

Powers

|                   | Alpha | Sample Size | Power   |
|-------------------|-------|-------------|---------|
| Actual Power      | 0.05  | 20          | 0.72381 |
| Hypothesis Powers | 0.05  | 50          | 0.99321 |
|                   | 0.05  | 100         | 1       |
|                   | 0.05  | 200         | 1       |

Box Charts

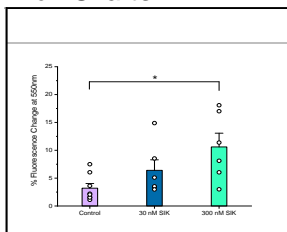

Supplement: supp [file elife-65822-supp-v1.zip]
