# Supplementary material for: Voltage-clamp fluorometry analysis of structural rearrangements of ATP-gated channel P2X2 upon hyperpolarization
Source: eLife journal article supplement (doi:10.7554/elife.65822), 2021-05-19

Paired Sample t Test (13/04/2019 17:47:14)

Input Data

|                | Data                             | Range   |
|----------------|----------------------------------|---------|
| 1st Data Range | [Book1]"0+30uM ATP"!A"0 ATP"     | [1*:5*] |
| 2nd Data Range | [Book1]"0+30uM ATP"!B"30uM A TP" | [1*:5*] |

Descriptive Statistics

|            |            | N  | Mean     | SD      | SEM     | Median   |
|------------|------------|----|----------|---------|---------|----------|
| "0 ATP"    |            | 5  | -2.78579 | 1.68882 | 0.75526 | -1.99926 |
| "30uM ATP" |            | 5  | -1.8153  | 0.95568 | 0.42739 | -1.58223 |
|            | Difference | 5  | -0.97049 | 0.8933  | 0.3995  | -0.64928 |
|            | Overall    | 10 | -2.30055 | 1.3911  | 0.4399  | -1.86732 |

Test Statistics

| t Statistic | DF | Prob> t |
|-------------|----|---------|
| -2.42928    | 4  | 0.07204 |

Null Hypothesis: mean1-mean2 = 0  
Alternative Hypothesis: mean1-mean2 <> 0

At the 0.05 level, the difference of the population means is NOT significantly different from the test difference(0).

Confidence Intervals for Mean

| Conf. Levels in % | Low er Limits | Upper Limits |
|-------------------|---------------|--------------|
| 90                | -1.82216      | -0.11883     |
| 95                | -2.07967      | 0.13869      |
| 99                | -2.80981      | 0.86883      |

Powers

|               | Alpha | Sample Size | Pow er |
|---------------|-------|-------------|--------|
| Actual Pow er | 0.05  | 5           | 0.4568 |
| Hypo. Pow er  | 0.05  | 50          | 1      |
|               | 0.05  | 100         | 1      |
|               | 0.05  | 200         | 1      |

Plots

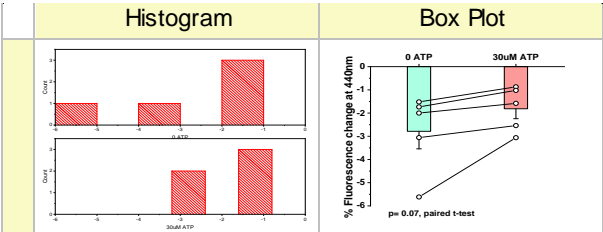

Supplement: supp [file elife-65822-supp-v1.zip]
