# Supplementary material for: Voltage-clamp fluorometry analysis of structural rearrangements of ATP-gated channel P2X2 upon hyperpolarization
Source: eLife journal article supplement (doi:10.7554/elife.65822), 2021-05-19

## Two sample t Test (23/12/2020 18:46:36)

### Input Data

|                | Data                                   | Range    |
|----------------|----------------------------------------|----------|
| 1st Data Range | [Book1]Sheet1!A"Control"               | [1*:7*]  |
| 2nd Data Range | [Book1]Sheet1!B"Sik inhibitor (300nM)" | [1*:12*] |

### Descriptive Statistics

|                         |            | N  | Mean     | SD      | SEM     | Median  |
|-------------------------|------------|----|----------|---------|---------|---------|
| "Control"               |            | 7  | 0.77717  | 0.73843 | 0.2791  | 1.17764 |
| "Sik inhibitor (300nM)" |            | 12 | 0.83292  | 0.78954 | 0.22792 | 0.5043  |
|                         | Difference |    | -0.05576 |         | 0.36711 |         |
|                         | Overall    | 19 | 0.81238  | 0.75065 | 0.17221 | 0.5098  |

Standard Error of Mean (SEM) of difference is computed under the condition that equal variance is assumed.

### t-Test Statistics

|                                                  | t Statistic | DF       | Prob> t |
|--------------------------------------------------|-------------|----------|---------|
| Equal Variance Assumed                           | -0.15188    | 17       | 0.88107 |
| Equal Variance NOT Assumed<br>(Welch Correction) | -0.15473    | 13.41631 | 0.87934 |

Null Hypothesis: mean1-mean2 = 0

Alternative Hypothesis: mean1-mean2 <> 0

At 0.05 level, when equal variance is assumed, Mean1 - Mean2 is NOT significantly different from 0

At 0.05 level, when equal variance is NOT assumed, Mean1 - Mean2 is NOT significantly different from 0

### Confidence Intervals for Mean

|  | Conf. Levels in % | Lower Limits | Upper Limits |
|--|-------------------|--------------|--------------|
|  | 90                | -0.69438     | 0.58286      |
|  | 95                | -0.83028     | 0.71877      |
|  | 99                | -1.11972     | 1.0082       |

### Powers

|              | Alpha | Sample Size | Power   |
|--------------|-------|-------------|---------|
| Actual Power | 0.05  | 19          | 0.05236 |
| Hypo. Power  | 0.05  | 50          | 0.05664 |
|              | 0.05  | 100         | 0.0638  |
|              | 0.05  | 200         | 0.07808 |

### Plots

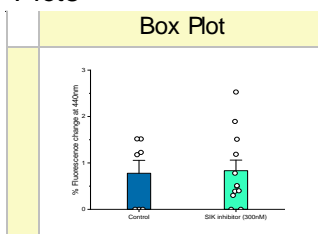

Supplement: supp [file elife-65822-supp-v1.zip]
