# Supplementary material for: Voltage-clamp fluorometry analysis of structural rearrangements of ATP-gated channel P2X2 upon hyperpolarization
Source: eLife journal article supplement (doi:10.7554/elife.65822), 2021-05-19

# Paired Sample t Test (16/04/2019 15:42:26)

## Input Data

|                | Data                              | Range   |
|----------------|-----------------------------------|---------|
| 1st Data Range | [Book1]"0+100uM ATP"!A"0 ATP"     | [1*:8*] |
| 2nd Data Range | [Book1]"0+100uM ATP"!B"100uM ATP" | [1*:8*] |

## Descriptive Statistics

|             | N  | Mean     | SD      | SEM     | Median   |
|-------------|----|----------|---------|---------|----------|
| "0 ATP"     | 8  | -2.42686 | 0.97287 | 0.34396 | -2.18359 |
| "100uM ATP" | 8  | -0.90564 | 0.42716 | 0.15102 | -0.7687  |
| Difference  | 8  | -1.52122 | 0.70733 | 0.25008 | -1.43932 |
| Overall     | 16 | -1.66625 | 1.06955 | 0.26739 | -1.43058 |

## Test Statistics

| t Statistic | DF | Prob> t    |
|-------------|----|------------|
| -6.08297    | 7  | 4.99402E-4 |

Null Hypothesis: mean1-mean2 = 0

Alternative Hypothesis: mean1-mean2 <> 0

At the 0.05 level, the difference of the population means is significantly different from the test difference(0).

## Confidence Intervals for Mean

| Conf. Levels in % | Lower Limits | Upper Limits |
|-------------------|--------------|--------------|
| 90                | -1.99502     | -1.04743     |
| 95                | -2.11257     | -0.92988     |
| 99                | -2.39637     | -0.64608     |

## Powers

|               | Alpha | Sample Size | Pow er  |
|---------------|-------|-------------|---------|
| Actual Pow er | 0.05  | 8           | 0.99923 |
| Hypo. Pow er  | 0.05  | 50          | 1       |
|               | 0.05  | 100         | 1       |
|               | 0.05  | 200         | 1       |

## Plots

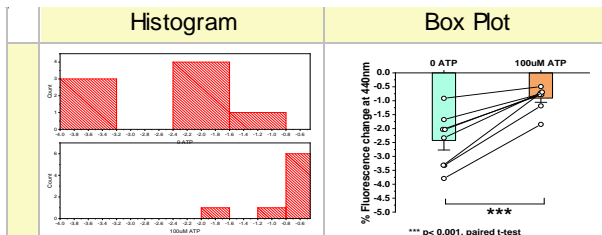

Supplement: supp [file elife-65822-supp-v1.zip]
