# Supplementary material for: Voltage-clamp fluorometry analysis of structural rearrangements of ATP-gated channel P2X2 upon hyperpolarization
Source: eLife journal article supplement (doi:10.7554/elife.65822), 2021-05-19

## Paired Sample t Test (13/04/2019 17:47:28)

### Input Data

|                | Data                              | Range   |
|----------------|-----------------------------------|---------|
| 1st Data Range | [Book1]"0+100uM ATP"!A"0 ATP"     | [1*:5*] |
| 2nd Data Range | [Book1]"0+100uM ATP"!B"100uM ATP" | [1*:5*] |

### Descriptive Statistics

|             |            | N  | Mean    | SD      | SEM     | Median   |
|-------------|------------|----|---------|---------|---------|----------|
| "0 ATP"     |            | 5  | -2.6538 | 0.97417 | 0.43566 | -2.59239 |
| "100uM ATP" |            | 5  | -0.997  | 0.43184 | 0.19312 | -0.97998 |
|             | Difference | 5  | -1.6568 | 0.6585  | 0.29449 | -1.59295 |
|             | Overall    | 10 | -1.8254 | 1.12568 | 0.35597 | -1.61207 |

### Test Statistics

|  | t Statistic | DF | Prob> t |
|--|-------------|----|---------|
|  | -5.62604    | 4  | 0.00491 |

Null Hypothesis: mean1-mean2 = 0

Alternative Hypothesis: mean1-mean2 <> 0

At the 0.05 level, the difference of the population means is significantly different from the test difference(0).

### Confidence Intervals for Mean

|  | Conf. Levels in % | Low er Limits | Upper Limits |
|--|-------------------|---------------|--------------|
|  | 90                | -2.28461      | -1.029       |
|  | 95                | -2.47443      | -0.83917     |
|  | 99                | -3.01266      | -0.30095     |

### Powers

|               | Alpha | Sample Size | Pow er  |
|---------------|-------|-------------|---------|
| Actual Pow er | 0.05  | 5           | 0.98278 |
| Hypo. Pow er  | 0.05  | 50          | 1       |
|               | 0.05  | 100         | 1       |
|               | 0.05  | 200         | 1       |

### Plots

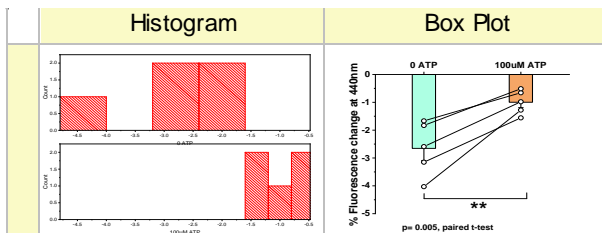

Supplement: supp [file elife-65822-supp-v1.zip]
