# Supplementary material for: Voltage-clamp fluorometry analysis of structural rearrangements of ATP-gated channel P2X2 upon hyperpolarization
Source: eLife journal article supplement (doi:10.7554/elife.65822), 2021-05-19

# Paired Sample t Test (16/04/2019 19:10:57)

## Input Data

|                | Data                             | Range   |
|----------------|----------------------------------|---------|
| 1st Data Range | [Book1]"0+10uM ATP"IA "0 ATP"    | [1*:4*] |
| 2nd Data Range | [Book1]"0+10uM ATP"IB "10uM ATP" | [1*:4*] |

## Descriptive Statistics

|            | N | Mean     | SD      | SEM     | Median   |
|------------|---|----------|---------|---------|----------|
| "0 ATP"    | 4 | -1.92026 | 0.87334 | 0.43667 | -1.77044 |
| "10uM ATP" | 4 | -0.73892 | 0.30401 | 0.152   | -0.77447 |
| Difference | 4 | -1.18134 | 0.59668 | 0.29834 | -0.99597 |
| Overall    | 8 | -1.32959 | 0.87477 | 0.30928 | -1.04703 |

## Test Statistics

| t Statistic | DF | Prob> t |
|-------------|----|---------|
| -3.95969    | 3  | 0.02876 |

Null Hypothesis: mean1-mean2 = 0

Alternative Hypothesis: mean1-mean2 <> 0

At the 0.05 level, the difference of the population means is significantly different from the test difference(0).

## Confidence Intervals for Mean

| Conf. Levels in % | Lower Limits | Upper Limits |
|-------------------|--------------|--------------|
| 90                | -1.88345     | -0.47923     |
| 95                | -2.13079     | -0.23188     |
| 99                | -2.92392     | 0.56124      |

## Powers

|              | Alpha | Sample Size | Power   |
|--------------|-------|-------------|---------|
| Actual Power | 0.05  | 4           | 0.74738 |
| Hypo. Power  | 0.05  | 50          | 1       |
|              | 0.05  | 100         | 1       |
|              | 0.05  | 200         | 1       |

## Plots

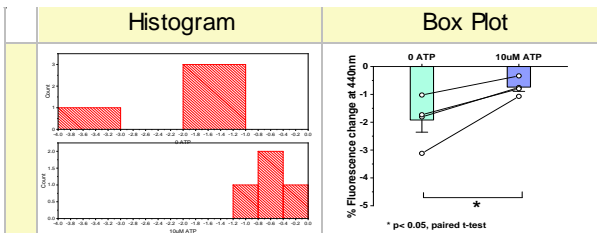

Supplement: supp [file elife-65822-supp-v1.zip]
