# Supplementary material for: Voltage-clamp fluorometry analysis of structural rearrangements of ATP-gated channel P2X2 upon hyperpolarization
Source: eLife journal article supplement (doi:10.7554/elife.65822), 2021-05-19
Supplement: supp [file elife-65822-supp-v1.zip]

|                                            |                         |         |       |
|--------------------------------------------|-------------------------|---------|-------|
| Table Analyzed                             | time constant 30 vs 300 |         |       |
| Column B                                   | 300 $\mu$ M ATP         |         |       |
| vs.                                        | vs.                     |         |       |
| Column A                                   | 30 $\mu$ M ATP          |         |       |
| Unpaired t test                            |                         |         |       |
| P value                                    | <0.0001                 |         |       |
| P value summary                            | ****                    |         |       |
| Significantly different (P < 0.05)?        | Yes                     |         |       |
| One- or two-tailed P value?                | Two-tailed              |         |       |
| t                                          | df                      | t=7.154 | df=8  |
| How big is the difference?                 |                         |         |       |
| Mean of column A                           |                         | 70.41   |       |
| Mean of column B                           |                         | 26.9    |       |
| Difference between means (B - A) $\pm$ SEM | -43.51 $\pm$ 6.081      |         |       |
| 95% confidence interval                    | -57.53 to -29.48        |         |       |
| R squared (eta squared)                    |                         | 0.8648  |       |
| F test to compare variances                |                         |         |       |
| F                                          | DFn                     | Dfd     | 2.923 |
| P value                                    |                         | 0.5534  |       |
| P value summary                            | ns                      |         |       |
| Significantly different (P < 0.05)?        | No                      |         |       |
| Data analyzed                              |                         |         |       |
| Sample size                                | column A                |         | 3     |
| Sample size                                | column B                |         | 7     |

6

2
