# Supplementary material for: Voltage-clamp fluorometry analysis of structural rearrangements of ATP-gated channel P2X2 upon hyperpolarization
Source: eLife journal article supplement (doi:10.7554/elife.65822), 2021-05-19

# Paired Sample t Test (17/04/2019 11:18:31)

## Input Data

|                | Data                            | Range   |
|----------------|---------------------------------|---------|
| 1st Data Range | [Book1]"0+30uM ATP"IA"0 ATP"    | [1*:8*] |
| 2nd Data Range | [Book1]"0+30uM ATP"IB"30uM ATP" | [1*:8*] |

## Descriptive Statistics

|            | N  | Mean     | SD      | SEM     | Median   |
|------------|----|----------|---------|---------|----------|
| "0 ATP"    | 8  | -2.65928 | 0.92277 | 0.32625 | -2.68857 |
| "30uM ATP" | 8  | -1.68962 | 0.60991 | 0.21564 | -1.63125 |
| Difference | 8  | -0.96966 | 0.44321 | 0.1567  | -0.84499 |
| Overall    | 16 | -2.17445 | 0.90648 | 0.22662 | -2.13188 |

## Test Statistics

| t Statistic | DF | Prob> t    |
|-------------|----|------------|
| -6.18808    | 7  | 4.50457E-4 |

Null Hypothesis: mean1-mean2 = 0

Alternative Hypothesis: mean1-mean2 <> 0

At the 0.05 level, the difference of the population means is significantly different from the test difference(0).

## Confidence Intervals for Mean

| Conf. Levels in % | Lower Limits | Upper Limits |
|-------------------|--------------|--------------|
| 90                | -1.26654     | -0.67278     |
| 95                | -1.34019     | -0.59913     |
| 99                | -1.51803     | -0.4213      |

## Powers

|              | Alpha | Sample Size | Power   |
|--------------|-------|-------------|---------|
| Actual Power | 0.05  | 8           | 0.99943 |
| Hypo. Power  | 0.05  | 50          | 1       |
|              | 0.05  | 100         | 1       |
|              | 0.05  | 200         | 1       |

## Plots

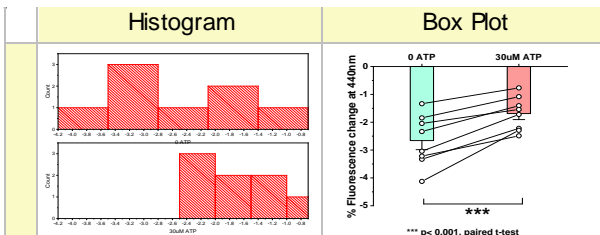

Supplement: supp [file elife-65822-supp-v1.zip]
