# Supplementary material for: Voltage-clamp fluorometry analysis of structural rearrangements of ATP-gated channel P2X2 upon hyperpolarization
Source: eLife journal article supplement (doi:10.7554/elife.65822), 2021-05-19
Supplement: supp [file elife-65822-supp-v1.zip]

|                                          |                                        |         |
|------------------------------------------|----------------------------------------|---------|
| Table Analyzed                           | 0 ATP vs 300 $\mu$ M ATP batch 1 VCF A |         |
| Column B                                 | 300 $\mu$ M ATP                        |         |
| vs.                                      | vs.                                    |         |
| Column A                                 | 0 ATP                                  |         |
| Paired t test                            |                                        |         |
| P value                                  |                                        | 0.0327  |
| P value summary                          | *                                      |         |
| Significantly different ( $P < 0.05$ )?  | Yes                                    |         |
| One- or two-tailed P value?              | Two-tailed                             |         |
| t                                        | df                                     | t=3.205 |
| Number of pairs                          |                                        | 5       |
| How big is the difference?               |                                        |         |
| Mean of differences (B - A)              |                                        | -0.1621 |
| SD of differences                        |                                        | 0.1131  |
| SEM of differences                       |                                        | 0.05058 |
| 95% confidence interval                  | -0.3026 to -0.02170                    |         |
| R squared (partial eta squared)          |                                        | 0.7198  |
| How effective was the pairing?           |                                        |         |
| Correlation coefficient (r)              |                                        | 0.9992  |
| P value (one tailed)                     | <0.0001                                |         |
| P value summary                          | ****                                   |         |
| Was the pairing significantly effective? | Yes                                    |         |

df=4
