# Supplementary figures and images for: Voltage-clamp fluorometry analysis of structural rearrangements of ATP-gated channel P2X2 upon hyperpolarization
Source: eLife journal article supplement (doi:10.7554/elife.65822), 2021-05-19

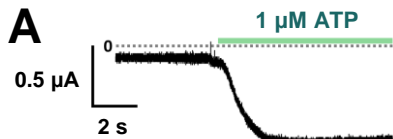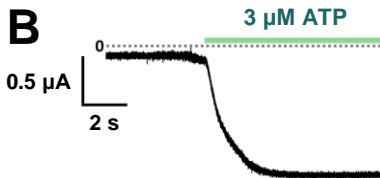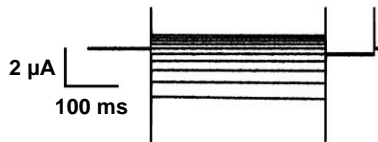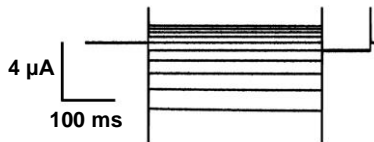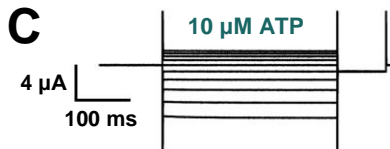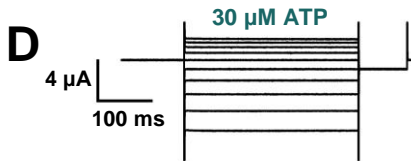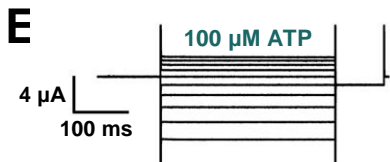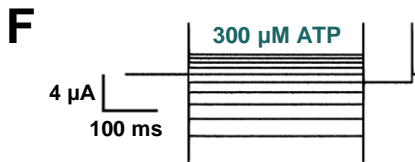

Supplement: supp [file elife-65822-supp-v1.zip]

# A K308R/A337Anap

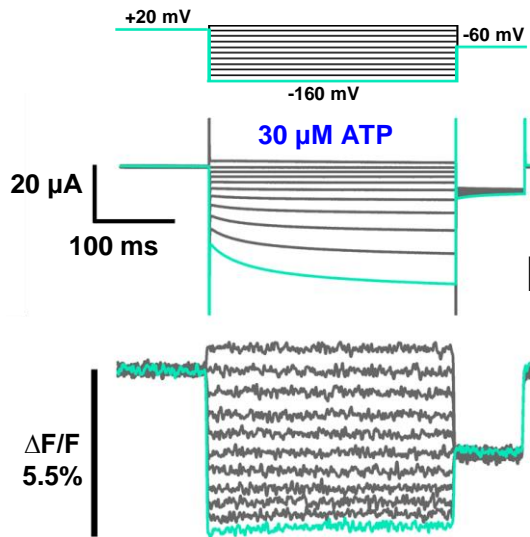

# B

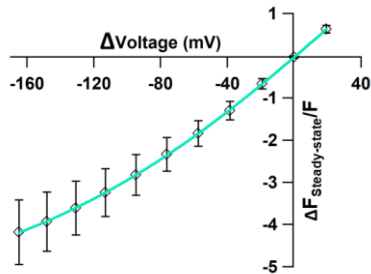

# C

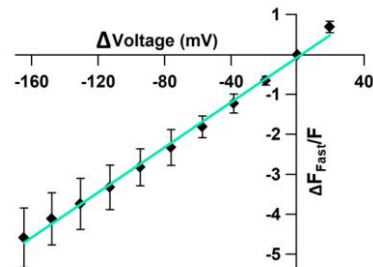

# D

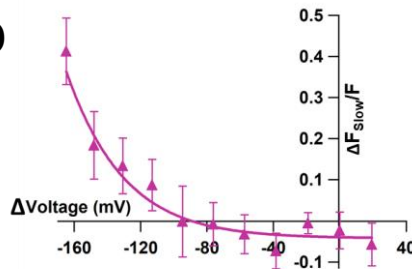

# G

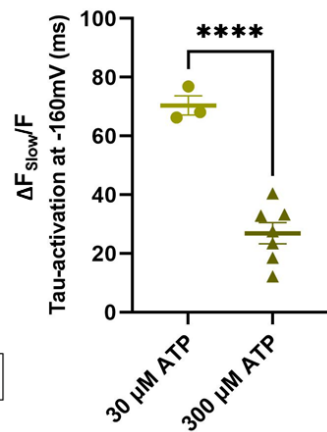

# E

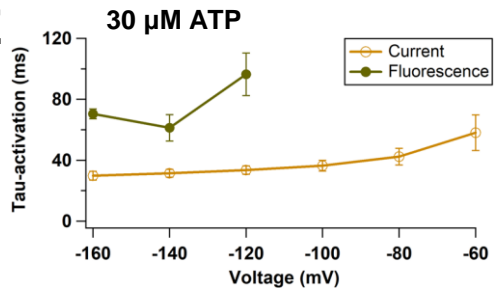

# F

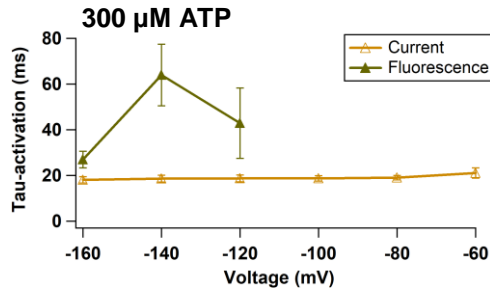

Supplement: supp [file elife-65822-supp-v1.zip]

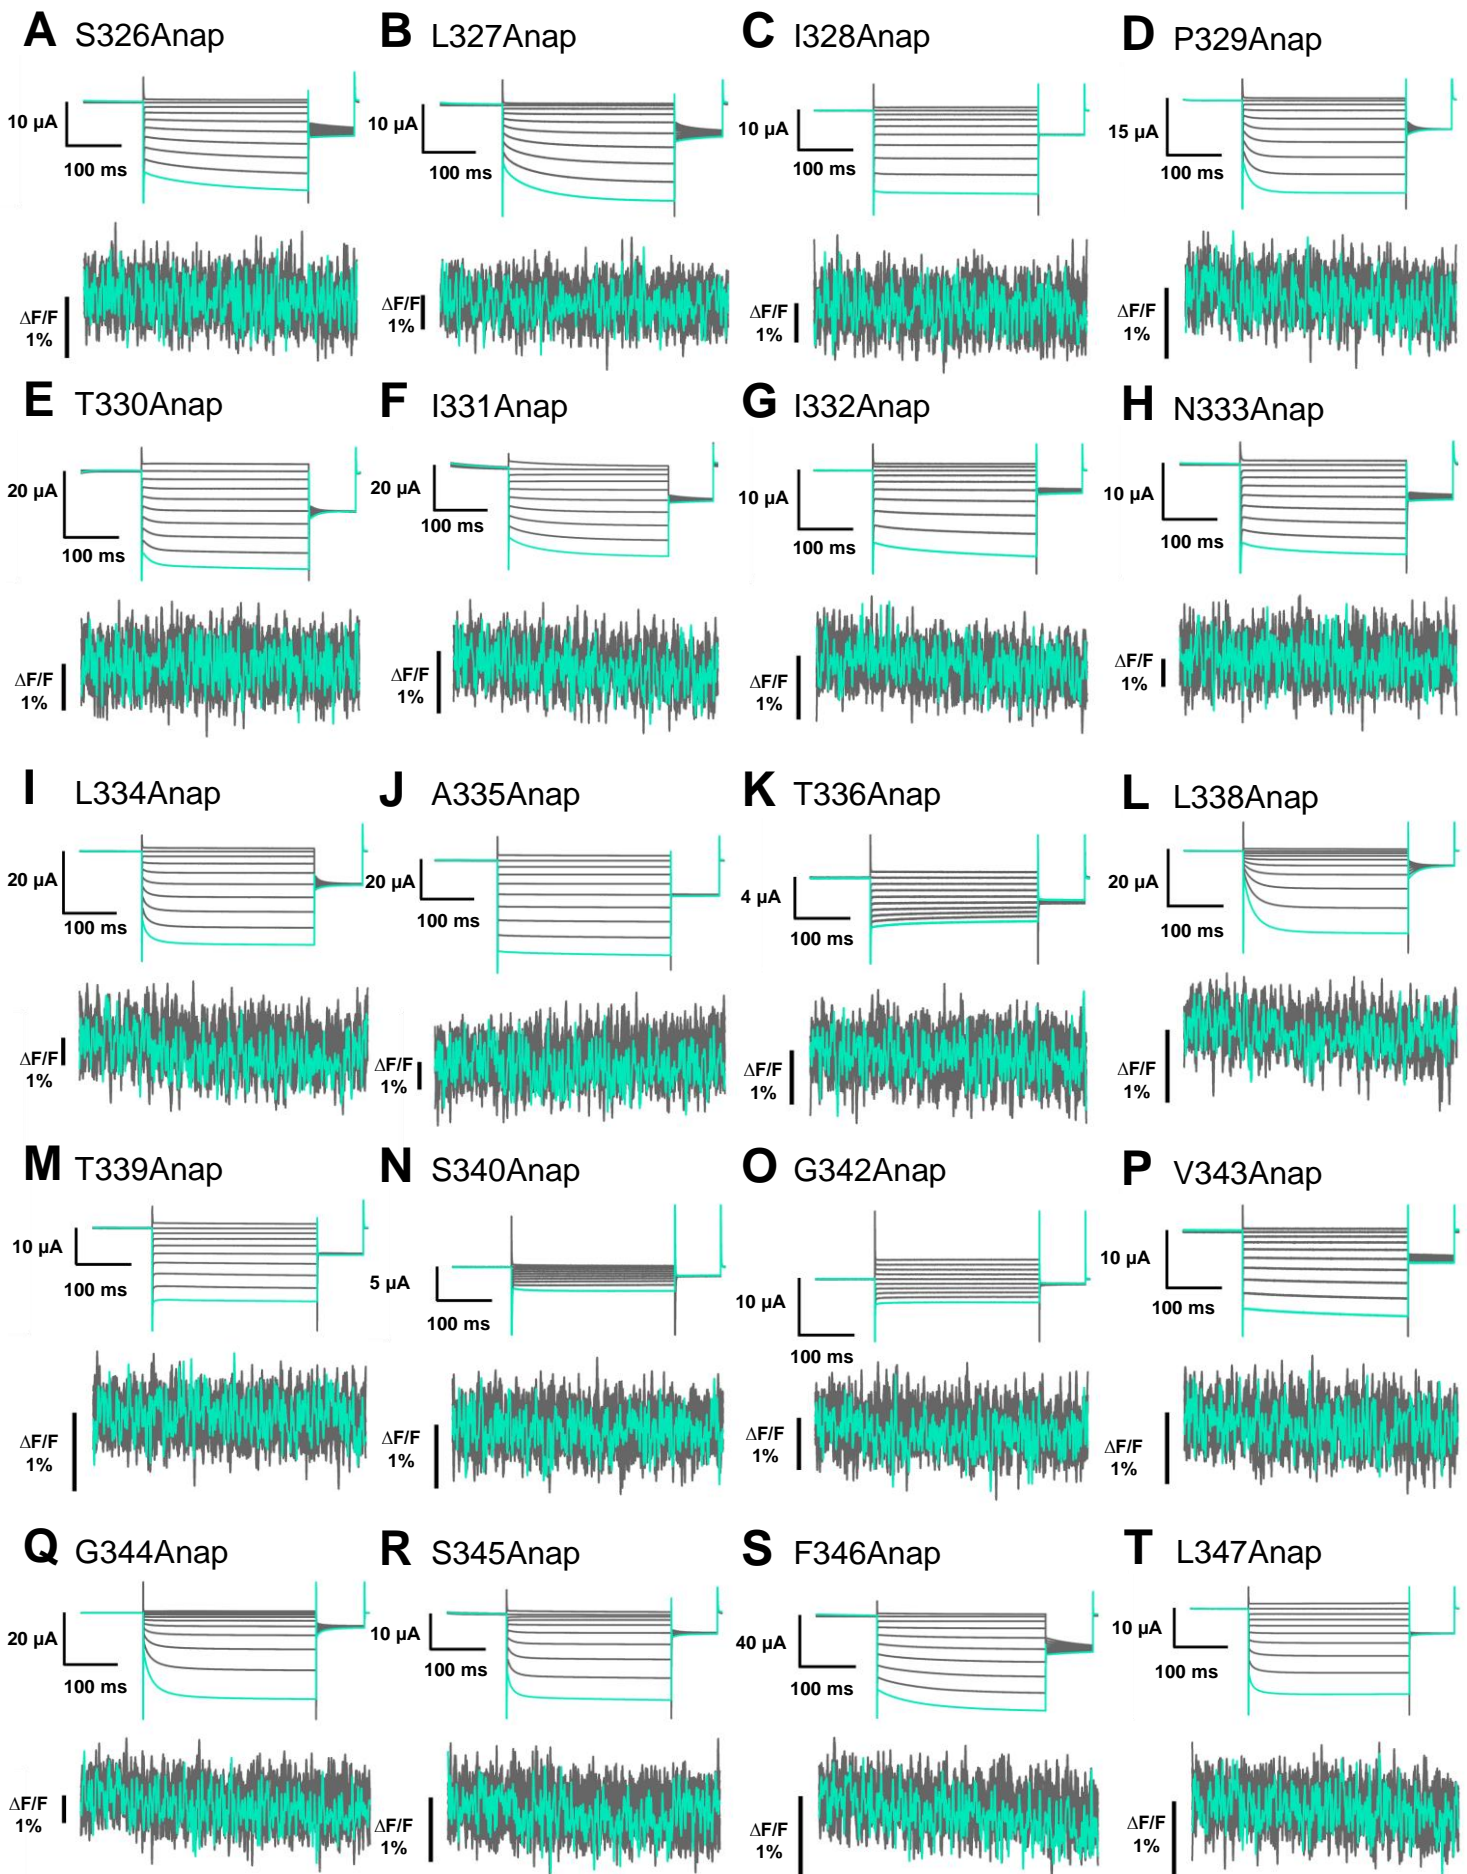

Supplement: supp [file elife-65822-supp-v1.zip]

**A** R313F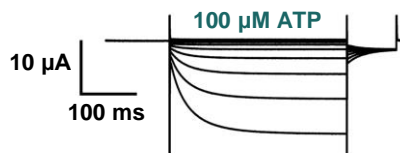**B**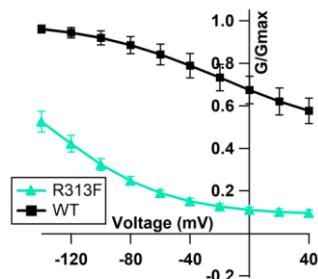**C** R313W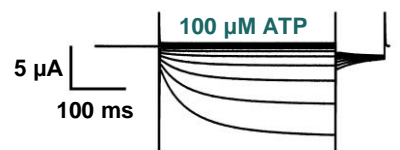**D**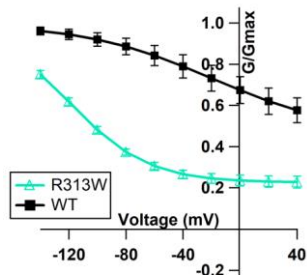**E**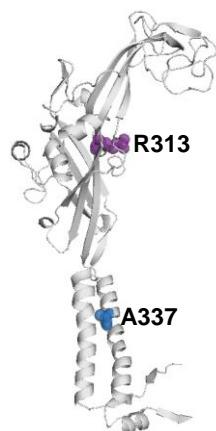**F** R313W/A337Anap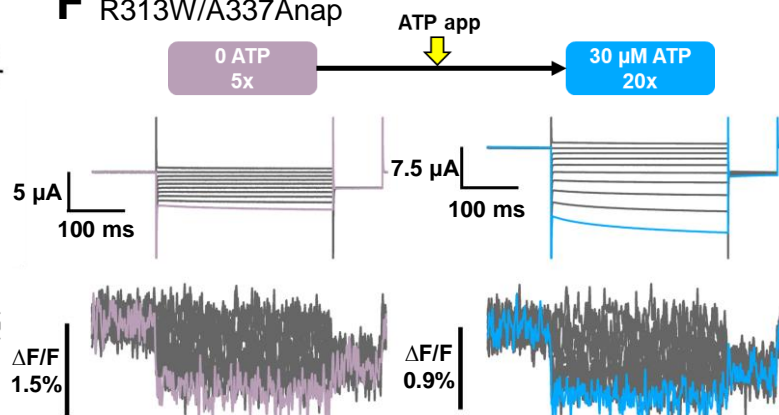**G**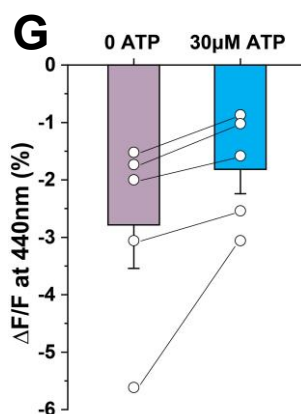**J**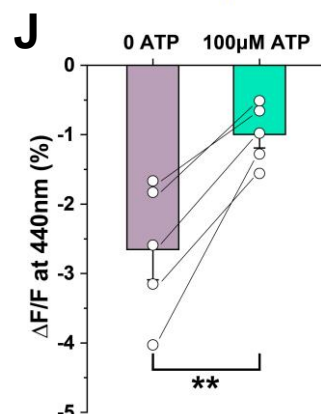**H**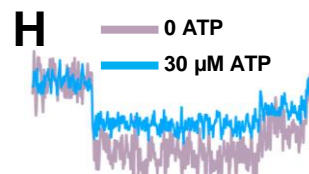**K**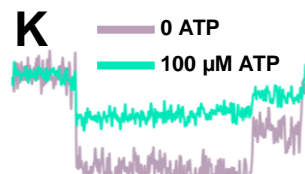**I**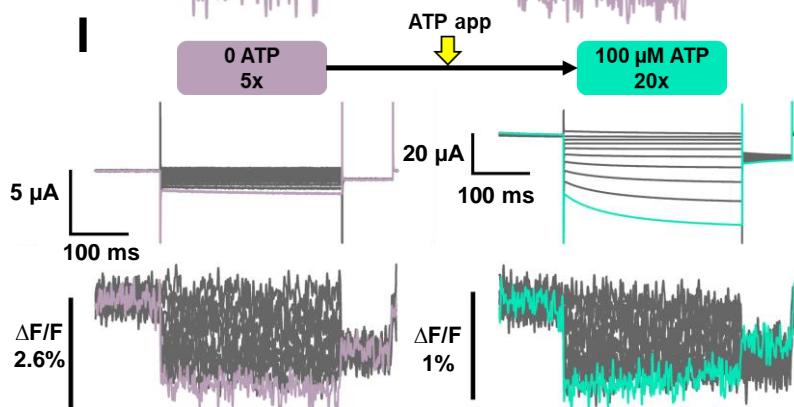

Supplement: supp [file elife-65822-supp-v1.zip]

## A L334Anap + SIK inhibitor

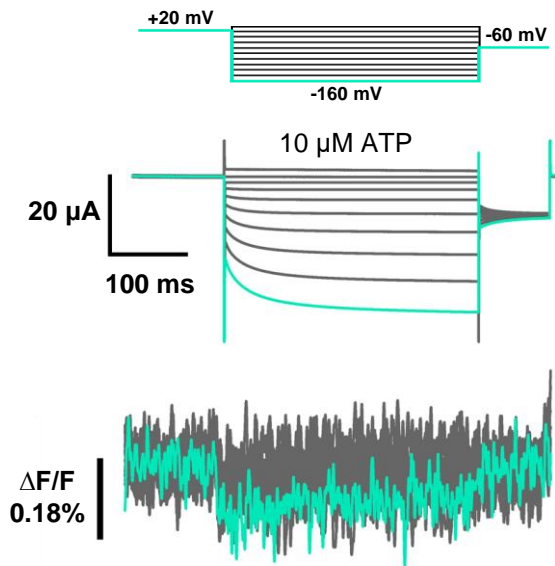

B

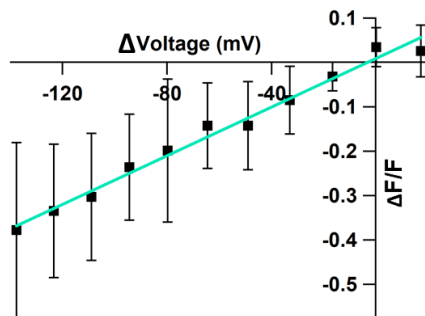

## C L338Anap + SIK inhibitor

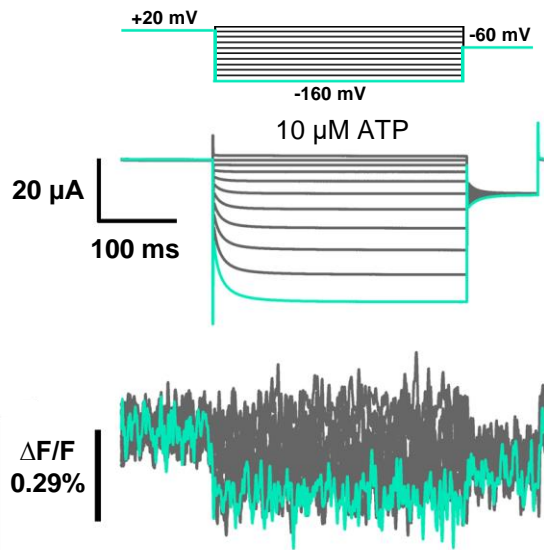

D

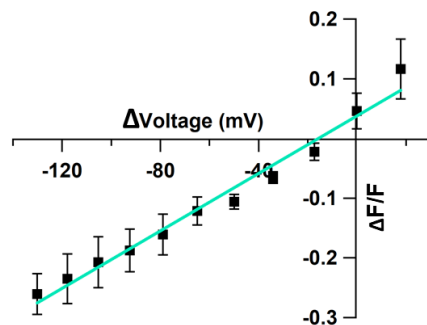

Supplement: supp [file elife-65822-supp-v1.zip]

# A K308R/A337Anap

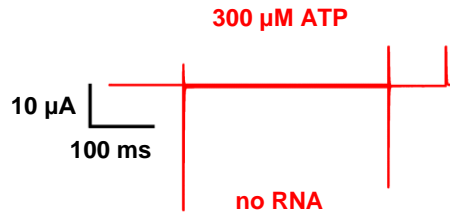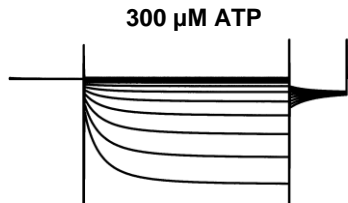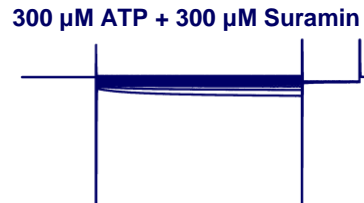

# B K308R/A337Anap

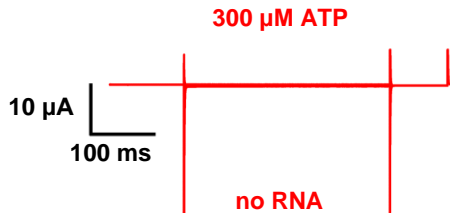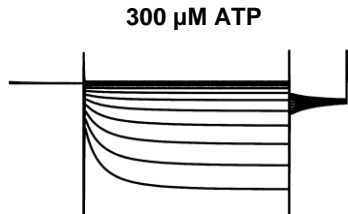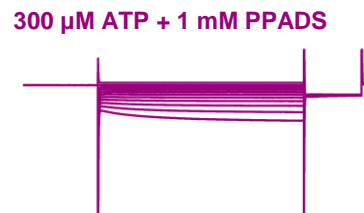

Supplement: supp [file elife-65822-supp-v1.zip]

**A** Control

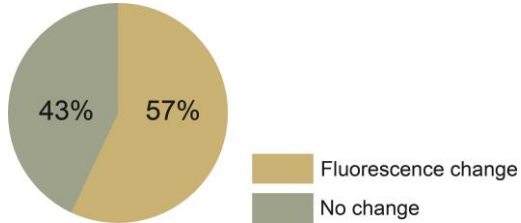

**B** 300 nM SIK inhibitor

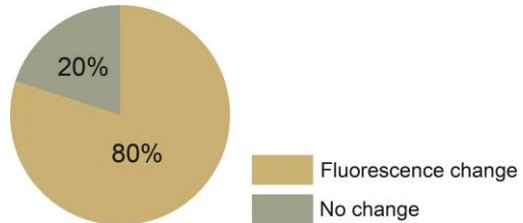

Supplement: supp [file elife-65822-supp-v1.zip]

**A** K308R/A337Anap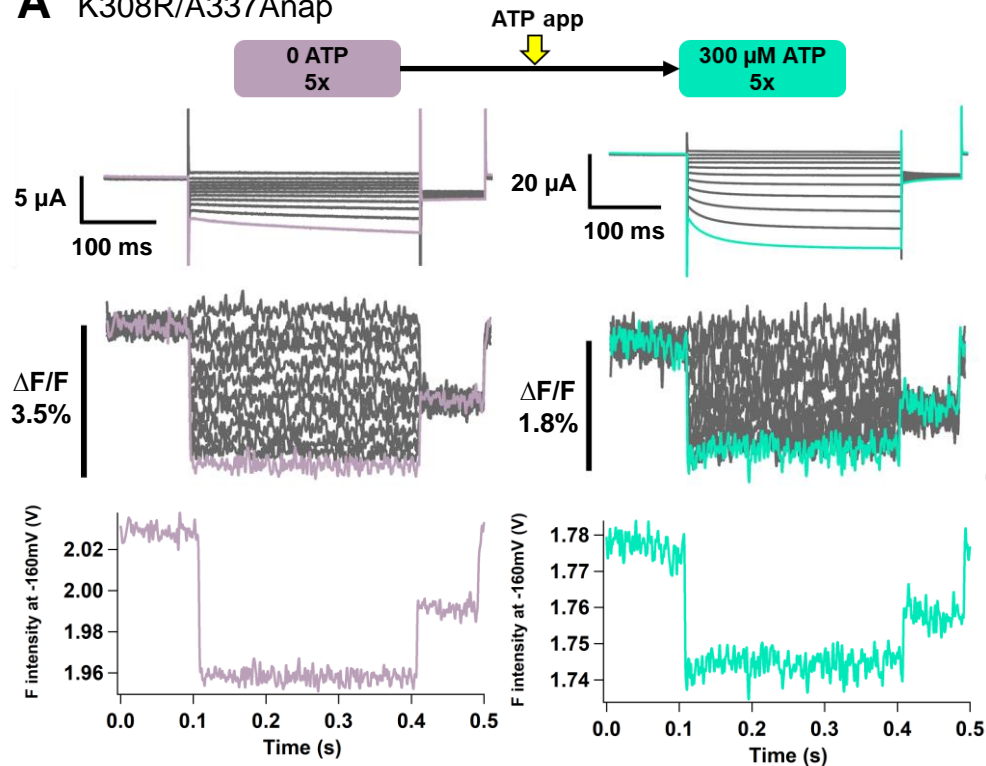**B**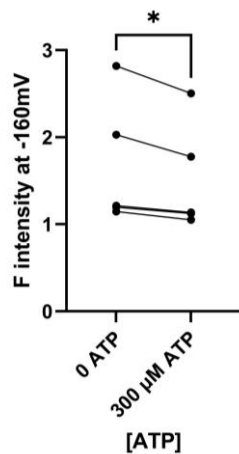**C**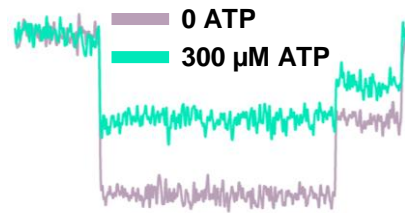

Supplement: supp [file elife-65822-supp-v1.zip]

# A A337Anap

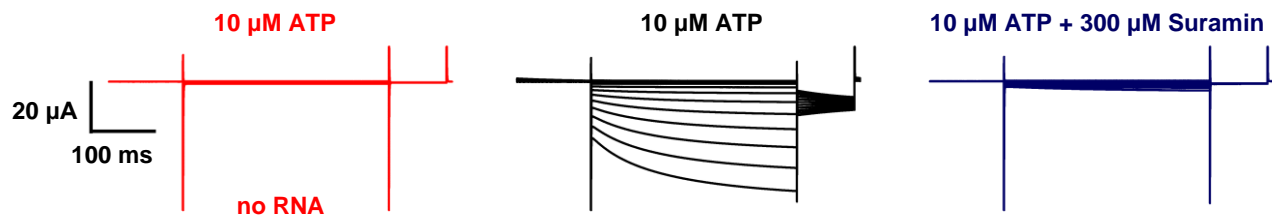

# B A337Anap

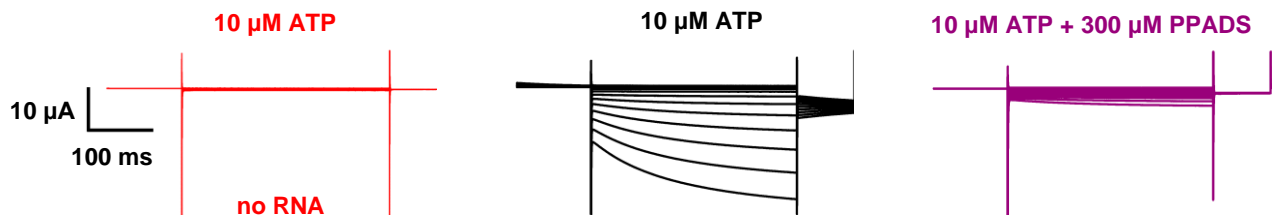

# C I341Anap

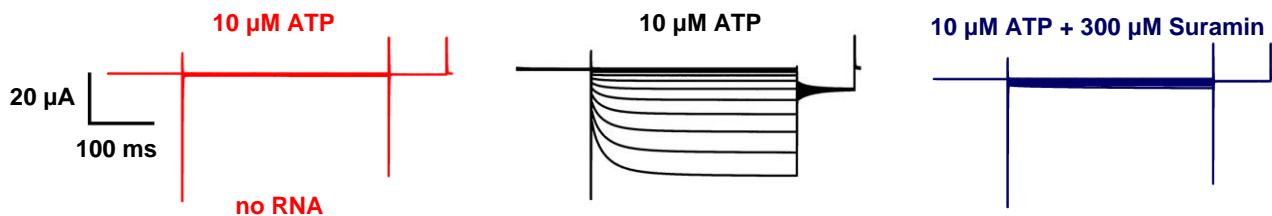

# D I341Anap

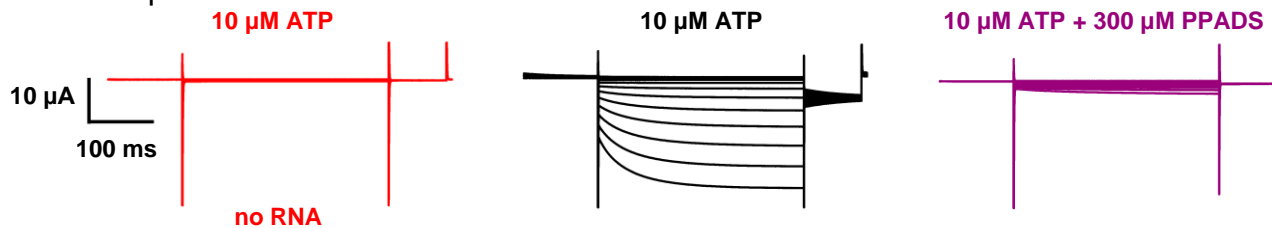

Supplement: supp [file elife-65822-supp-v1.zip]
